# Supplementary material for: Health and Economic Impacts of Lockdown Policies in the Early Stage of COVID-19 in the United States
Source: Atypon-hosted journal article supplement (doi:10.1287/serv.2023.0321), 2023-03-17
Supplement: serv.2023.0321.sm1.pdf [file serv.2023.0321.sm1.pdf]

## **Online Appendices: *Health and Economic Impacts of Lockdown Policies in the Early Stage of COVID-19 in the U.S.***

|                                                                                                        |      |
|--------------------------------------------------------------------------------------------------------|------|
| <b>A. Summary of Socio-Demographic Information Retrieved from Mathematica</b> .....                    | ec2  |
| <b>B. Model Validation</b> .....                                                                       | ec3  |
| <b>C. Parameter Estimations</b> .....                                                                  | ec5  |
| C.1. Quality-of-life scores .....                                                                      | ec5  |
| C.2. Direct cost (utilization of existing resources) .....                                             | ec5  |
| C.3. Direct cost (expansion of resources) .....                                                        | ec5  |
| C.4. Indirect cost (lost income and productivity) .....                                                | ec7  |
| C.5. Indirect cost (quarantine) .....                                                                  | ec7  |
| C.6. Scale reduction (shrinkage) factor for the MCMC simulation .....                                  | ec7  |
| C.7. Confidence intervals of predicted transmission rates against covariates with high $P$ values .... | ec7  |
| <b>D. Comparison of Intervention Policies</b> .....                                                    | ec9  |
| D.1. Micro-simulation model .....                                                                      | ec9  |
| D.2. Further consideration for high-risk population .....                                              | ec9  |
| D.3. Increase in QALY and cost .....                                                                   | ec10 |
| D.4. Cost-effectiveness probability .....                                                              | ec14 |
| D.5. Aversions in health outcomes .....                                                                | ec16 |
| <b>E. Robustness Checks</b> .....                                                                      | ec18 |
| E.1. qol scores .....                                                                                  | ec18 |
| E.2. Proportion of population with lost income .....                                                   | ec18 |
| E.3. Projected infections .....                                                                        | ec18 |
| E.4. Population risk perception .....                                                                  | ec18 |
| E.5. Proportion Losing Income (when staying home under no-intervention) .....                          | ec18 |
| E.6. Proportion quarantining .....                                                                     | ec18 |
| E.7. Capacity level of hospital resources .....                                                        | ec18 |

**APPENDIX A. Summary of Socio-Demographic Information Retrieved from Mathematica****Table A.1 Summary of other socio-demographics information<sup>†</sup>**

| State          | Population <sup>‡</sup> | Annual Birth <sup>‡</sup> | Annual Death <sup>‡</sup> | Employment <sup>§</sup> |
|----------------|-------------------------|---------------------------|---------------------------|-------------------------|
| Alabama        | 4,849,377               | 57,313                    | 53,879                    | 2,618,073               |
| Alaska         | 736,732                 | 10,031                    | 4,819                     | 445,031                 |
| Arizona        | 6,731,484               | 81,942                    | 60,523                    | 3,520,657               |
| Arkansas       | 2,966,369               | 36,640                    | 31,322                    | 1,606,087               |
| California     | 38,802,500              | 462,617                   | 282,520                   | 21,245,509              |
| Colorado       | 5,355,866               | 64,524                    | 39,116                    | 3,215,903               |
| Connecticut    | 3,590,886               | 34,567                    | 31,149                    | 2,235,248               |
| Delaware       | 935,614                 | 10,683                    | 9,454                     | 548,130                 |
| Dist. of Col.  | 658,893                 | 9,493                     | 5,677                     | 813,734                 |
| Florida        | 19,893,297              | 221,695                   | 211,692                   | 10,679,883              |
| Georgia        | 10,097,343              | 127,873                   | 86,319                    | 5,559,982               |
| Hawaii         | 1,431,603               | 16,878                    | 12,748                    | 873,157                 |
| Idaho          | 1,654,930               | 22,220                    | 13,308                    | 947,483                 |
| Illinois       | 12,859,995              | 144,299                   | 110,004                   | 7,608,799               |
| Indiana        | 6,596,855               | 80,711                    | 62,175                    | 3,727,784               |
| Iowa           | 3,107,126               | 37,672                    | 28,809                    | 2,034,878               |
| Kansas         | 2,904,021               | 35,457                    | 25,230                    | 1,855,548               |
| Kentucky       | 4,425,092               | 53,471                    | 46,074                    | 2,438,265               |
| Louisiana      | 4,649,676               | 58,498                    | 46,343                    | 2,517,085               |
| Maine          | 1,330,089               | 12,073                    | 14,335                    | 830,221                 |
| Maryland       | 5,976,407               | 70,091                    | 51,453                    | 3,437,502               |
| Massachusetts  | 6,794,422               | 70,419                    | 58,564                    | 4,198,813               |
| Michigan       | 9,909,877               | 109,472                   | 95,983                    | 5,454,613               |
| Minnesota      | 5,489,594               | 67,642                    | 43,200                    | 3,562,386               |
| Mississippi    | 2,994,079               | 35,978                    | 31,536                    | 1,568,063               |
| Missouri       | 6,083,672               | 71,297                    | 60,141                    | 3,663,291               |
| Montana        | 1,023,579               | 11,618                    | 9,870                     | 647,427                 |
| Nebraska       | 1,881,503               | 25,343                    | 15,582                    | 1,245,362               |
| Nevada         | 2,839,099               | 35,932                    | 25,610                    | 1,666,531               |
| New Hampshire  | 1,326,813               | 12,004                    | 12,125                    | 848,016                 |
| New Jersey     | 8,944,469               | 99,501                    | 75,723                    | 5,128,341               |
| New Mexico     | 2,085,572               | 23,125                    | 18,388                    | 1,115,677               |
| New York       | 19,746,227              | 222,924                   | 164,817                   | 11,039,874              |
| North Carolina | 10,042,802              | 119,203                   | 94,312                    | 5,460,841               |
| North Dakota   | 756,927                 | 10,536                    | 6,250                     | 487,337                 |
| Ohio           | 11,594,163              | 134,291                   | 117,750                   | 6,829,647               |
| Oklahoma       | 3,878,051               | 48,759                    | 40,266                    | 2,159,540               |
| Oregon         | 3,970,239               | 43,305                    | 36,563                    | 2,320,043               |
| Pennsylvania   | 12,787,209              | 135,190                   | 133,439                   | 7,304,947               |
| Rhode Island   | 1,056,298               | 10,481                    | 9,802                     | 615,347                 |
| South Carolina | 4,896,146               | 56,353                    | 50,744                    | 2,507,978               |
| South Dakota   | 858,469                 | 11,911                    | 7,337                     | 564,481                 |
| Tennessee      | 6,549,352               | 80,239                    | 67,977                    | 3,746,010               |
| Texas          | 26,956,958              | 378,664                   | 202,786                   | 14,157,309              |
| Utah           | 2,942,902               | 48,642                    | 17,443                    | 1,673,907               |
| Vermont        | 626,562                 | 5,581                     | 5,634                     | 427,422                 |
| Virginia       | 8,326,289               | 98,403                    | 69,729                    | 4,936,137               |
| Washington     | 7,061,530               | 87,950                    | 58,587                    | 3,948,743               |
| West Virginia  | 1,844,128               | 17,888                    | 22,567                    | 921,898                 |
| Wisconsin      | 5,771,337               | 63,712                    | 50,393                    | 3,595,084               |
| Wyoming        | 584,153                 | 6,601                     | 4,971                     | 389,776                 |

<sup>†</sup>Information is obtained by Mathematica, Wolfram Research, Inc. (see the codes below). Information for per capita income and median age is provided in the main body (see Table 5). <sup>‡</sup>This information is used to measure the initial population,  $N(0)$ , and vital dynamics  $\mu$  and  $\nu$  used in the SEIRS model.  $N(0)=\text{Population}$ ,  $\mu=(1/365)*(\text{Annual Birth}/\text{Population})$ ,  $\nu=(1/365)*(\text{Annual Death}/\text{Population})$ . <sup>§</sup>This is used to obtain the employment rate in each state (see Appendix C.4).

**Sample of Mathematica codes to retrieve demographic and cost information (shown for the state of Michigan)**

```
Per capita income: AdministrativeDivisionData[Entity["AdministrativeDivision", "Michigan", "UnitedStates"], "PerCapitaIncome"]
Population: AdministrativeDivisionData[Entity["AdministrativeDivision", "Michigan", "UnitedStates"], "Population"]
Birth: AdministrativeDivisionData[Entity["AdministrativeDivision", "Michigan", "UnitedStates"], "AnnualBirths"]
Death: AdministrativeDivisionData[Entity["AdministrativeDivision", "Michigan", "UnitedStates"], "AnnualDeaths"]
Median age: AdministrativeDivisionData[Entity["AdministrativeDivision", "Michigan", "UnitedStates"], "MedianAge"]
Employment: AdministrativeDivisionData[Entity["AdministrativeDivision", "Michigan", "UnitedStates"], "PerCapitaIncome"]
```

**APPENDIX B. Model Validation**

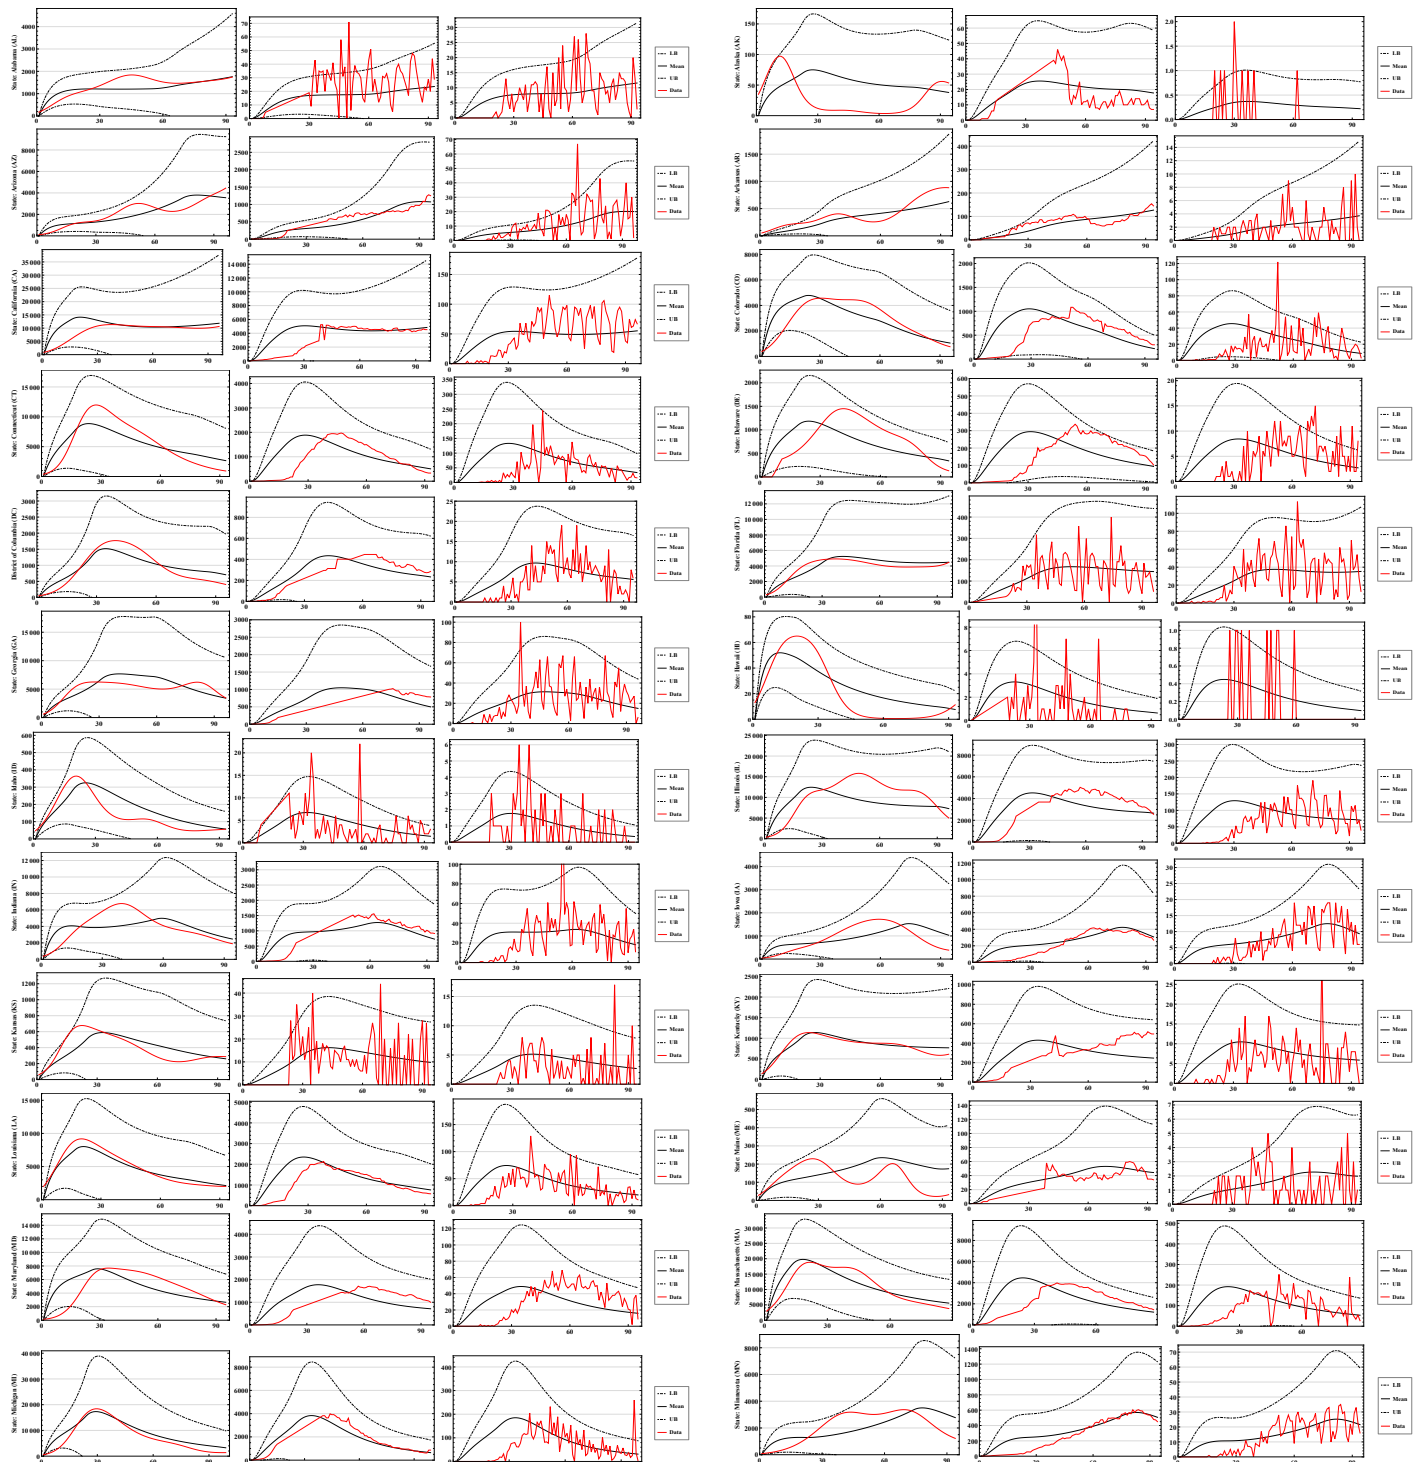

**Figure B.1 (Color online) SEIRS model validation: comparison of our predictions with the data**  
*Notes.* For each state, columns from left to right represent results for the total number of projected infections, hospitalizations, and deaths, respectively. For projected infections, benchmark data comes from IHME (2020). For hospitalizations and deaths, benchmark data comes from Foldi and Csefalvay (2020). LB/UB: Lower/upper bounds represent 90% CIs for each outcome. x-axis represents time (days). For each state, day 0 is different (see Table 2, column “Data”).



## APPENDIX C. Parameter Estimations

**C.1. Quality-of-life scores.** We characterize qol scores as follows:

$$q_i = \begin{cases} 1.0, & \text{if } i \in \{1, 11\} & \text{Compartment(s): susceptible, recovered,} \\ x \in [0.8, 1.0], & \text{if } i = 2 & \text{Compartment(s): exposed/presymptomatic,} \\ x \in [0.7, 0.9], & \text{if } i = 3 & \text{Compartment(s): infected asymptomatic,} \\ x \in [0.6, 0.8], & \text{if } i = 4 & \text{Compartment(s): infected symptomatic,} \\ x \in [0.5, 0.7], & \text{if } i = 5 & \text{Compartment(s): infected hospitalized (common bed),} \\ x \in [0.3, 0.5], & \text{if } i = 6 & \text{Compartment(s): infected hospitalized (ICU bed),} \\ x \in [0.1, 0.3], & \text{if } i = 7 & \text{Compartment(s): infected hospitalized (ICU bed \& ventilator),} \\ x \in [0.7, 0.9], & \text{if } i = 8 & \text{Compartment(s): carrier post discharge (was hospitalized common bed),} \\ x \in [0.6, 0.8], & \text{if } i = 9 & \text{Compartment(s): carrier post discharge (was hospitalized ICU bed),} \\ x \in [0.5, 0.7], & \text{if } i = 10 & \text{Compartment(s): carrier post discharge (was hospitalized ICU bed \& ventilator),} \\ 0.0, & \text{if } i = 12 & \text{Compartment(s): dead,} \end{cases} \quad (\text{EC.1})$$

where we note the following points: **(a)** Since we measure QALY per single day, we divide each qol score by 365 to account for the daily counterpart. **(b)** The range for infected patients hospitalized with common beds is consistent with the value of 0.6 reported in the medical literature (Liu et al. 2020). **(c)** When qol scores are not reported by the literature, we set up the ranges such that the qol scores would properly reflect on their relative severity. For example, the average qol score for an infected hospitalized patient (in a common bed) is 0.6, whereas its counterpart for an infected hospitalized patient (with an ICU bed) is 0.4. **(d)** For cases that are still carriers of the disease post hospital discharge, we assume that their health will be improved compared to when they were hospitalized. Of note, this improvement is more noticeable for patients who had been hospitalized with an ICU bed and a ventilator. **(e)** These ranges allow us to account for variations in qol scores for different compartments. Moreover, in our robustness checks, we will consider two alternative scenarios for qol scores where they are selected from either higher or lower ranges (see Appendix E.1).

Furthermore, regarding the terminal qol score, we calculate it by:  $Q_i = (q_i/r)(1 - e^{-r \cdot RLE})$ , where  $q_i$  is the qol score,  $r = 0.03$  is a discount rate (it measures the deterioration of a patient's health status over the remaining lifetime), and  $RLE$  is the residual life expectancy (Sassi 2006).  $RLE$  typically depends on age and gender. Following Arias et al. (2021), we take the average of  $RLE$  values across genders, and adjust it based on the randomly selected age. We also note that since we aim to conduct robustness checks on the qol score  $q_i$ , we do not perform robustness checks on the terminal qol score  $Q_i$ , because it is a function of  $q_i$ .

**C.2. Direct cost (utilization of existing resources).** We take a back-of-the-envelope calculation to estimate the operating costs of hospital resources per day: **(a)** We obtain the costs of using an ICU bed or an ICU bed with a ventilator per day (Dasta et al. 2005). We then use the U.S. healthcare inflation rate to prorate the corresponding values from 2005 to 2020 (YCHARTS 2020). **(b)** To measure the operating cost of a common non-ICU bed, we use the average ratio of cost of an ICU bed to that of a non-ICU bed reported to be 5.85 (Norris et al. 1995). **(c)** The costs obtained via the previous two steps are used for the state of Washington that is reported to have the highest inpatient expenses per day (KFF 2018a). For other states, we adjust costs based on the ratio of inpatient expenses in each state compared to that in the state of Washington KFF (2018a). Estimated values are reported in Table C.1.

**C.3. Direct cost (expansion of resources).** **(a) Beds:** We resort to CDC (2020) to obtain the number of inpatient and ICU beds across the U.S. To measure the number of common beds, we subtract the number of ICU beds from inpatient beds. Furthermore, as reported by Modern Healthcare (2015), the cost of adding one more hospital bed is reported to be between \$5K and \$10K for common beds and \$25K and \$30K for ICU beds. Of note, we incur this cost if the number of patients requiring, say, common beds is more than the existing capacity of these equipments in a state. **(b) Ventilators:** There are the total of ~160,000 ventilators in the U.S. (AHA 2022). To determine the distribution of these ventilators across U.S. states, we resort to the numbers reported by Rubinson et al. (2010). If the number of patients requiring ventilators is more than the existing number of these equipments in a state, then we incur the cost of capacity expansion by adding one more ventilator per patient, which could cost between \$5K and \$50K (Medtronic 2019). Estimated values are reported in Table C.1.

**Table C.1 Information of hospital resources across U.S. states**

| State          | Cost of resources utilization (\$/day) |                      |                                   | Existing capacity of resources |                        |                         |
|----------------|----------------------------------------|----------------------|-----------------------------------|--------------------------------|------------------------|-------------------------|
|                | Common bed <sup>†</sup>                | ICU bed <sup>†</sup> | ICU bed & ventilator <sup>†</sup> | Inpatient bed <sup>‡</sup>     | ICU bed <sup>‡</sup>   | Ventilator <sup>‡</sup> |
| Alabama        | 470.29                                 | 2,751.20             | 3,892.49                          | (7992,19393)                   | (899,2697)             | 2,360                   |
| Alaska         | 668.88                                 | 3,912.98             | 5,536.21                          | (0,1448)                       | (0,133)                | 267                     |
| Arizona        | 818.44                                 | 4,787.87             | 6,774.04                          | (10815,18677)                  | (1571,2899)            | 3,358                   |
| Arkansas       | 572.63                                 | 3,349.91             | 4,739.56                          | (5915,12027)                   | (519,1644)             | 1,624                   |
| California     | 1,075.82                               | 6,293.55             | 8,904.33                          | (70233,84479)                  | (11406,14265)          | 16,899                  |
| Colorado       | 927.48                                 | 5,425.78             | 7,676.58                          | (4946,14736)                   | (384,2404)             | 2,342                   |
| Connecticut    | 863.82                                 | 5,053.37             | 7,149.68                          | (2925,13038)                   | (632,2219)             | 1,765                   |
| Delaware       | 925.35                                 | 5,413.31             | 7,658.93                          | (102,4603)                     | (0,571)                | 513                     |
| Dist. of Col.  | 1,057.85                               | 6,188.42             | 8,755.59                          | (1981,3561) <sup>§</sup>       | (301,496) <sup>§</sup> | 459                     |
| Florida        | 674.06                                 | 3,943.27             | 5,579.07                          | (56037,71291)                  | (8638,11747)           | 11,046                  |
| Georgia        | 561.97                                 | 3,287.54             | 4,651.32                          | (16436,28099)                  | (2110,4155)            | 5,368                   |
| Hawaii         | 805.34                                 | 4,711.25             | 6,665.64                          | (0,5430)                       | (0,1620)               | 619                     |
| Idaho          | 972.25                                 | 5,687.72             | 8,047.17                          | (2485,5307)                    | (244,750)              | 467                     |
| Illinois       | 802.90                                 | 4,697.00             | 6,645.47                          | (20134,41662)                  | (2978,8426)            | 5,927                   |
| Indiana        | 789.19                                 | 4,616.81             | 6,532.02                          | (14423,22010)                  | (1968,3362)            | 3,776                   |
| Iowa           | 487.04                                 | 2,849.20             | 4,031.15                          | (5037,10994)                   | (456,1443)             | 1,391                   |
| Kansas         | 586.34                                 | 3,430.09             | 4,853.01                          | (6357,11871)                   | (681,1845)             | 1,319                   |
| Kentucky       | 595.78                                 | 3,485.33             | 4,931.16                          | (5096,18954)                   | (455,2269)             | 2,434                   |
| Louisiana      | 618.32                                 | 3,617.19             | 5,117.72                          | (9879,17222)                   | (1530,3252)            | 2,845                   |
| Maine          | 802.90                                 | 4,697.00             | 6,645.47                          | (1041,5451)                    | (14,830)               | 549                     |
| Maryland       | 857.42                                 | 5,015.95             | 7,096.74                          | (0,6839)                       | (0,2541)               | 2,445                   |
| Massachusetts  | 925.35                                 | 5,413.31             | 7,658.93                          | (6146,20436)                   | (308,2139)             | 3,611                   |
| Michigan       | 731.02                                 | 4,276.48             | 6,050.50                          | (17118,29640)                  | (2120,4562)            | 4,737                   |
| Minnesota      | 724.62                                 | 4,239.06             | 5,997.56                          | (8452,17034)                   | (1017,2462)            | 2,080                   |
| Mississippi    | 417.59                                 | 2,442.94             | 3,456.35                          | (4282,11634)                   | (618,1619)             | 1,973                   |
| Missouri       | 719.14                                 | 4,206.98             | 5,952.18                          | (17286,27443)                  | (2154,4216)            | 3,686                   |
| Montana        | 485.52                                 | 2,840.29             | 4,018.54                          | (810,2745)                     | (27,194)               | 406                     |
| Nebraska       | 631.42                                 | 3,693.81             | 5,226.12                          | (3095,6860)                    | (469,1283)             | 1,196                   |
| Nevada         | 606.44                                 | 3,547.69             | 5,019.40                          | (4254,10602)                   | (407,1650)             | 1,932                   |
| New Hampshire  | 798.94                                 | 4,673.83             | 6,612.70                          | (1389,4339)                    | (93,529)               | 531                     |
| New Jersey     | 848.59                                 | 4,964.28             | 7,023.63                          | (5259,27911)                   | (114,6119)             | 3,814                   |
| New Mexico     | 865.65                                 | 5,064.06             | 7,164.81                          | (1510,3988)                    | (204,715)              | 939                     |
| New York       | 876.31                                 | 5,126.43             | 7,253.04                          | (33715,60371)                  | (5430,10309)           | 11,557                  |
| North Carolina | 680.46                                 | 3,980.69             | 5,632.01                          | (10109,32137)                  | (483,4455)             | 4,571                   |
| North Dakota   | 560.14                                 | 3,276.85             | 4,636.20                          | (331,3419)                     | (0,674)                | 462                     |
| Ohio           | 861.69                                 | 5,040.90             | 7,132.03                          | (21209,49023)                  | (5284,10346)           | 6,999                   |
| Oklahoma       | 600.35                                 | 3,512.06             | 4,968.98                          | (8492,16314)                   | (778,2537)             | 1,898                   |
| Oregon         | 1,046.88                               | 6,124.27             | 8,664.83                          | (2007,11481)                   | (112,1954)             | 1,290                   |
| Pennsylvania   | 769.09                                 | 4,499.21             | 6,365.63                          | (22996,52907)                  | (1961,7176)            | 7,728                   |
| Rhode Island   | 855.60                                 | 5,005.26             | 7,081.61                          | (421,1732)                     | (32,104)               | 503                     |
| South Carolina | 626.85                                 | 3,667.08             | 5,188.31                          | (7837,14336)                   | (929,2208)             | 2,434                   |
| South Dakota   | 469.98                                 | 2,749.42             | 3,889.97                          | (97,2751)                      | (0,359)                | 383                     |
| Tennessee      | 653.96                                 | 3,825.66             | 5,412.68                          | (13884,24086)                  | (1541,3457)            | 3,891                   |
| Texas          | 793.15                                 | 4,639.98             | 6,564.80                          | (58762,75847)                  | (8934,12176)           | 13,898                  |
| Utah           | 893.97                                 | 5,229.78             | 7,399.26                          | (2966,7174)                    | (404,1455)             | 1,290                   |
| Vermont        | 801.99                                 | 4,691.65             | 6,637.91                          | (0,1984)                       | (0,220)                | 231                     |
| Virginia       | 633.85                                 | 3,708.06             | 5,246.29                          | (10583,23988)                  | (990,3093)             | 3,422                   |
| Washington     | 1,081.91                               | 6,329.19             | 8,954.75                          | (8197,16632)                   | (634,3036)             | 2,145                   |
| West Virginia  | 552.22                                 | 3,230.52             | 4,570.65                          | (3867,8269)                    | (502,1097)             | 1,411                   |
| Wisconsin      | 770.01                                 | 4,504.56             | 6,373.20                          | (7735,16310)                   | (910,2050)             | 2,216                   |
| Wyoming        | 436.48                                 | 2,553.41             | 3,612.65                          | (328,1608)                     | (0,139)                | 301                     |

<sup>†</sup>To account for potential variations in our simulation, we consider a  $\pm 10\%$  variation based on these point estimates.

<sup>‡</sup>These are 95% confidence intervals (CIs) obtained from data reported in CDC (2020). We use these intervals in our simulation. Also, to count the number of common beds, we subtract the number of ICU beds from inpatient beds.

<sup>§</sup>CIs were not reported by CDC (2020). Instead, we take 20% of the average of CIs across other states. This is also consistent with the values reported by DC.gov (2022).

**C.4. Indirect cost (lost income and productivity).** Following notations in the main body, we let  $p_j(t)$ ,  $j = 1, \dots, 4$ , represent the proportion of working population who have lost less than 25%, between 25% and 50%, between 50% and 75%, and more than 75% of their income, respectively. According to Statista (2020), we have  $p_1(t) = 48\%$ ,  $p_2(t) = 20\%$ ,  $p_3(t) = 14\%$ ,  $p_4(t) = 18\%$ . However, the results reported in Statista (2020) do not account for the number and intensity of societal intervention policies. Indeed, to the best of our knowledge, there is no data reporting on this specific information. To accommodate this, we take the following steps to adjust our estimations: **(a)** When all three interventions are in place (including stay-at-home order and non-essential business closures, large-gathering ban, and school closures), we resort to the survey in in Statista (2020) and let  $p_1(t) = 48\%$ ,  $p_2(t) = 20\%$ ,  $p_3(t) = 14\%$ ,  $p_4(t) = 18\%$ . This is a reasonable assumption, because the foregoing survey was conducted in May 2020, when most states had undergone these three interventions (see Table 2 in the main body). **(b)** Recall that, when we transition between our counterfactual policies, we relax one intervention at a time (see Table 4 in the main body). When this happens, we drop the corresponding  $p_j$ 's for  $j = 2, 3, 4$  by 5% and add them to quantile 1. Based on this premise, we have (for description of Policies 1/2/3, see Table 4 in the main body):

$$(p_1(t), p_2(t), p_3(t), p_4(t)) = \begin{cases} (48\%, 20\%, 14\%, 18\%), & \text{under Policy 1: if } 1 \leq t \leq 61, \\ (63\%, 15\%, 9\%, 13\%), & \text{under Policy 1: if } 62 \leq t \leq 92, \\ (78\%, 10\%, 4\%, 8\%), & \text{under Policy 1: if } 93 \leq t \leq 122, \\ (48\%, 20\%, 14\%, 18\%), & \text{under Policy 2: if } 1 \leq t \leq 92, \\ (63\%, 15\%, 9\%, 13\%), & \text{under Policy 2: if } 93 \leq t \leq 122, \\ (48\%, 20\%, 14\%, 18\%), & \text{under Policy 3: if } 1 \leq t \leq 122. \end{cases} \quad (\text{EC.2})$$

**(c)** Despite these adjustments, the resulting values may not be exactly representative of reality. We account for this via two routes. First, in our simulation, we consider a  $\pm 10\%$  variation based on the point estimates reported for  $p_j$ 's in Equation (EC.2). Then, in our robustness checks, we consider two alternative scenarios for  $p_j$ 's (see Appendix E.2).

Finally, we obtain the employment rate  $\eta$  by the ratio Employment/Population, where the latter two measures were already introduced in Table A.1.

**C.5. Indirect cost (quarantine).** Based on the numbers reported by CDC (2021) and Bourdeaux et al. (2021), we make use of the following estimates.

|            |                                                                                                |
|------------|------------------------------------------------------------------------------------------------|
| $q_H$      | probability of a quarantining person doing that at home, $q_H \in [0.80, 0.99]$                |
| $q_F$      | probability of a quarantining person doing that at a facility (e.g., hotel), $q_F = 1 - q_H$   |
| $c_H$      | cost (\$/day) for quarantining at home, $c_H \in [30, 70]$                                     |
| $c_F$      | cost (\$/day) for quarantining at a facility, $c_F \in [80, 300]$                              |
| $d_A$      | # days of quarantine if asymptomatic, $d_A = 5$                                                |
| $d_S$      | # days of quarantine if symptomatic, $d_S = 10$                                                |
| $I_A^N(t)$ | # new asymptomatic infections on day $t$ (obtained from our estimation)                        |
| $I_S^N(t)$ | # new symptomatic infections on day $t$ (obtained from our estimation)                         |
| $\gamma$   | % of people who do quarantine when infected (set exogenously, subject to sensitivity analysis) |

**C.6. Scale reduction (shrinkage) factor for the MCMC simulation.** For the convergence of the Metropolis Hastings algorithm, we use the scale reduction factor over 2,000 iterations. As noted by, Brooks and Gelman (1998), when the value of this factor  $< 1.2$ , that is a good indication for the convergence of the algorithm. Figure C.1 shows the plots of this factor.

**C.7. Confidence intervals of predicted transmission rates against covariates with high  $P$  values.** See Figure C.2.

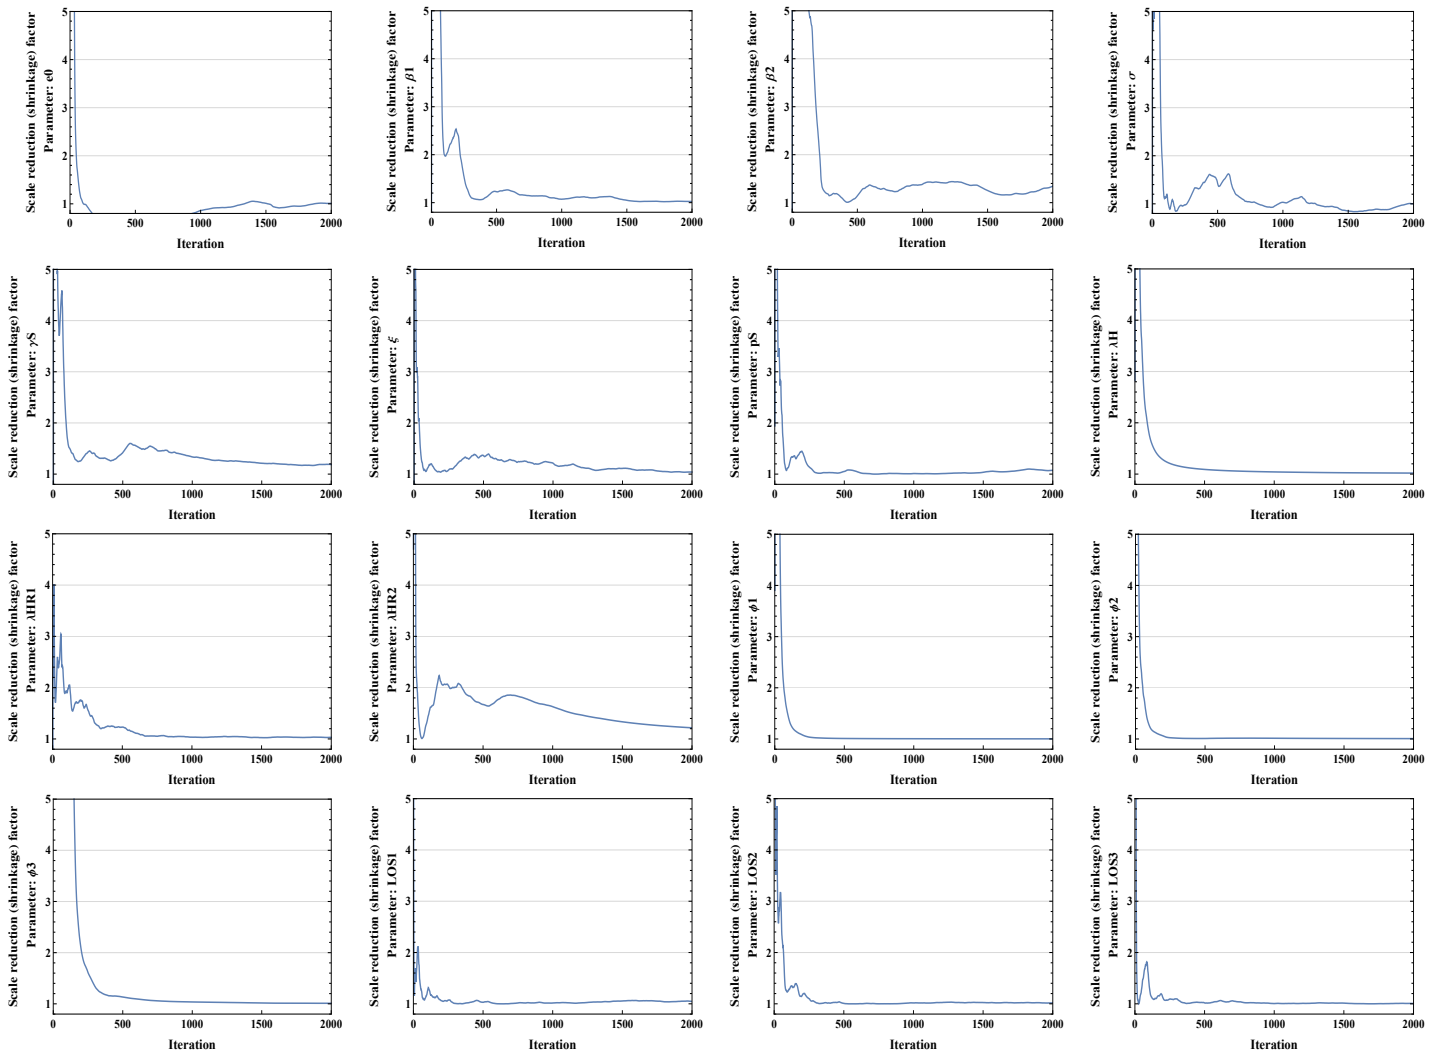

**Figure C.1** Scale reduction factor (results are shown for the state of California)  
*Notes.* See Table 3 (in the main body) for the description of notations.

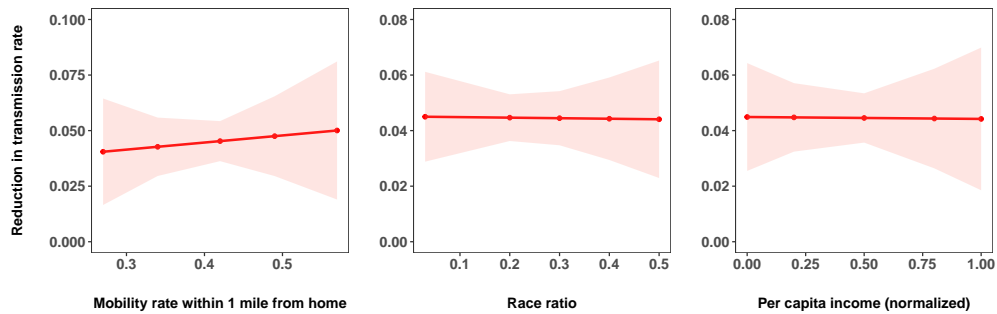

**Figure C.2** Confidence intervals of predicted transmission rates against covariates with high P-values

## APPENDIX D. Comparison of Intervention Policies

**D.1. Micro-simulation model.** See Table D.1 for the summary of this model.

**D.2. Further consideration for high-risk population.** Older people and minority races typically have lower qol scores compared to the average population. As reported by the literature, a person aging one year older could drop his/her qol score about 0.00343 per year compared to the same person one year younger. Similarly, a person with a minority race could drop the qol score about 0.01 per year compared to White people (see, e.g., Dyrbye et al. (2007), Grassi et al. (2020)). To address this in our analysis, we take the following steps: **(a)** We consider the ranges [0.001,0.005] and [0.005,0.2] for the drops in the qol score for each extra year a person ages and for Black/Hispanic races, respectively. **(b)** In our simulation, we generate random values from these two ranges and subtract their average from the qol scores that we already set in Equation (EC.1).

Of note, the high-risk population is also impacted from the economic standpoint. Indeed, compared to White people, Black/Hispanic populations are reported to be, on average, 15% more exposed to financial repercussions caused by COVID-19 (see, e.g., Saenz and Sparks (2020)). Thus, when accounting for the proportion of lost income in our simulation, we consider an increase in this proportion across all quantiles of lost income (see Equation (EC.2)). This increase is from the range [2%,5%], which is also consistent with the findings in the literature (see, e.g., Parker et al. (2020)).

**Table D.1 Summary of the micro-simulation model**

| <b>Input:</b> estimated parameters for each state and type/duration of conterfactual policies 1-3 <sup>†</sup>                                                                                     |                                                                                                                                                                                                                                                                                                                       |
|----------------------------------------------------------------------------------------------------------------------------------------------------------------------------------------------------|-----------------------------------------------------------------------------------------------------------------------------------------------------------------------------------------------------------------------------------------------------------------------------------------------------------------------|
| <b>1</b>                                                                                                                                                                                           | <b>for each</b> state                                                                                                                                                                                                                                                                                                 |
| <b>2</b>                                                                                                                                                                                           | <b>for</b> iteration $k=1$ to 10,000                                                                                                                                                                                                                                                                                  |
| <b>3</b>                                                                                                                                                                                           | randomly select the probability of a quarantining person doing that at home, the cost for quarantining at home, and the cost for quarantining at a facility from the corresponding ranges (see Appendix C.5)                                                                                                          |
| <b>4</b>                                                                                                                                                                                           | <b>for each</b> parameter in the SEIRS model <sup>††</sup><br>randomly select a value from the corresponding confidence interval (see Table 7)                                                                                                                                                                        |
| <b>5</b>                                                                                                                                                                                           | <b>for each</b> compartment in the SEIRS model<br>randomly select a qol score from the corresponding range (see Equation (EC.1))                                                                                                                                                                                      |
| <b>6</b>                                                                                                                                                                                           | <b>for each</b> hospital resource<br>randomly select an operation cost and an existing capacity from the corresponding ranges (see Table C.1)                                                                                                                                                                         |
| <b>7</b>                                                                                                                                                                                           | <b>for each</b> quantile $j$ of population losing their income <sup>c</sup><br>randomly select a ratio of lost income per day, $\theta_j \in [(j-1)*0.25, j*0.25]$<br>randomly select a proportion of population from the corresponding range (see Equation (EC.2))                                                   |
| <b>8</b>                                                                                                                                                                                           | <b>for</b> the current policy <sup>‡</sup><br>run the SEIRS model to obtain # people in each compartment over the time horizon (see Equations (1a)-(1h))<br>obtain the total QALY and cost (see Equations (2)-(5b))                                                                                                   |
| <b>9</b>                                                                                                                                                                                           | <b>for each</b> potential policy<br>predict transmission rates $\beta_1$ - $\beta_3$ (see Equation (8))<br>run the SEIRS model to obtain # people in each compartment over the time horizon (see Equations (1a)-(1h))<br>obtain the total QALY and cost (see Equations (2)-(5b))                                      |
| <b>10</b>                                                                                                                                                                                          | <b>for</b> the hypothetical no-intervention policy<br>predict the transmission rate under no-intervention $\hat{\beta}_0$ (see Equation (9))<br>run the SEIRS model to obtain # people in each compartment over the time horizon (see Equations (1a)-(1h))<br>obtain the total QALY and cost (see Equations (2)-(5b)) |
| <b>Output 1:</b> total QALY saved = total QALY (intervention policies) – total QALY (no-intervention) <sup>§</sup>                                                                                 |                                                                                                                                                                                                                                                                                                                       |
| <b>Output 2:</b> total extra cost = total cost (intervention policies) – total cost (no-intervention) <sup>§</sup>                                                                                 |                                                                                                                                                                                                                                                                                                                       |
| <b>Output 3:</b> ICER = $\frac{\text{Total cost (potential policy)} - \text{Total cost (current policy)}}{\text{Total QALY (potential policy)} - \text{Total QALY (current policy)}}$ <sup>¶</sup> |                                                                                                                                                                                                                                                                                                                       |

<sup>†</sup>The parameters that are not listed in this table are set based on the values mentioned throughout the paper. <sup>††</sup>Except these parameters:  $N(0)$ ,  $\mu$ , and  $\nu$ . <sup>‡</sup>The estimated transmission rates under the current policy in each state are among the inputs (see Table 7 for these estimations). <sup>§</sup>By intervention policies, we refer to our proposed (potential) policies and the current policies. <sup>¶</sup>A potential policy is said to be more cost-effective than the current policy if  $\text{ICER} \leq \text{WTP}$ . Since, in our simulation, we run 10,000 iterations under each policy, there will be  $10^4 \times 10^4 = 10^8$  comparisons of ICER with WTP. To this end, the cost-effectiveness (CE) probability of a potential policy compared to the current policy is measured as the percentage of these  $10^8$  comparisons where  $\text{ICER} \leq \text{WTP}$ .

**D.3. Increase in QALY and cost.** Results are presented per 100K capita and 100K high-risk capita.**Table D.2 Avg (std dev) of outcomes compared to no-intervention per 100K capita**  
**Outcomes: QALY gained (1,000 years) and extra cost (\$ million)**

| State                | Outcome | Policies        |                 |                  |                 |
|----------------------|---------|-----------------|-----------------|------------------|-----------------|
|                      |         | Current         | P1              | P2               | P3              |
| Alabama              | QALY    | 0.19 (0.02)     | 0.2 (0.02)      | 0.21 (0)         | 0.22 (0.03)     |
|                      | Cost    | -8.36 (1.32)    | -69.24 (0.84)   | -92.08 (0.24)    | -100.84 (1.16)  |
| Alaska               | QALY    | 15.45 (3.68)    | 16.31 (1.68)    | 16.07 (2.11)     | 16.65 (2.74)    |
|                      | Cost    | 51.37 (20.59)   | 31.32 (24.49)   | 11.37 (41.21)    | 3.15 (34.62)    |
| Arizona              | QALY    | 0.6 (0.04)      | 1.29 (0.04)     | 1.41 (0.03)      | 1.44 (0.08)     |
|                      | Cost    | -44.52 (1.4)    | -68 (0.52)      | -91.39 (0.72)    | -99.11 (1.23)   |
| Arkansas             | QALY    | 26.25 (4.25)    | 25.75 (1.41)    | 27.5 (2.19)      | 27.86 (4.68)    |
|                      | Cost    | -41.74 (0.89)   | -61.57 (0.89)   | -83.66 (2.33)    | -94.56 (2.99)   |
| California           | QALY    | 26.53 (3.51)    | 26.1 (3.76)     | 26.48 (3.59)     | 26.71 (2.95)    |
|                      | Cost    | 192.39 (38.96)  | 197.9 (17.52)   | 176.85 (9.9)     | 167.97 (53.27)  |
| Colorado             | QALY    | 11.56 (1.18)    | 11.64 (1.69)    | 11.66 (0.28)     | 11.95 (0.43)    |
|                      | Cost    | 0.99 (7.13)     | -36.82 (14.39)  | -73.64 (12.58)   | -86.08 (1.87)   |
| Connecticut          | QALY    | 132.89 (2.25)   | 133.8 (2.42)    | 140.19 (6.83)    | 145.04 (2.09)   |
|                      | Cost    | 974.64 (232.77) | 966.86 (134.93) | 1011.42 (174.61) | 994.48 (129.58) |
| Delaware             | QALY    | 59.53 (2.33)    | 61.71 (2.02)    | 61.97 (0.7)      | 60.18 (1.29)    |
|                      | Cost    | 313.52 (58.33)  | 296.42 (57.48)  | 282.41 (61.13)   | 272.54 (75.97)  |
| District of Columbia | QALY    | 107.48 (3.16)   | 122.52 (5.96)   | 139.44 (5.21)    | 151.52 (8.92)   |
|                      | Cost    | 508.67 (44.32)  | 491.12 (42.25)  | 480.36 (159.18)  | 454.65 (99.68)  |
| Florida              | QALY    | 12.07 (1.75)    | 12.21 (0.62)    | 12.44 (2.41)     | 12.33 (1.56)    |
|                      | Cost    | -27.03 (0.76)   | -72.89 (1.57)   | -97.07 (1.38)    | -106.43 (0.44)  |
| Georgia              | QALY    | 36.07 (2.78)    | 37.41 (4.21)    | 38.29 (1.1)      | 38.89 (2.28)    |
|                      | Cost    | 20.91 (9.11)    | -15.66 (11.25)  | -36.03 (15.08)   | -43.86 (2.76)   |
| Hawaii               | QALY    | 0.02 (0)        | 0.02 (0)        | 0.02 (0)         | 0.02 (0)        |
|                      | Cost    | -83.16 (2.33)   | -101.28 (1.16)  | -133.71 (2.51)   | -148.05 (2.32)  |
| Idaho                | QALY    | 59.79 (1.14)    | 59.7 (3.88)     | 59.92 (4.04)     | 61.58 (3.95)    |
|                      | Cost    | -46.61 (1.2)    | -70.1 (0.46)    | -91.52 (1.77)    | -102.36 (1.6)   |
| Illinois             | QALY    | 94.23 (6.98)    | 96.47 (5.93)    | 104.4 (3.8)      | 110.76 (1.14)   |
|                      | Cost    | 378.69 (78.33)  | 386.05 (96.44)  | 394.93 (104.58)  | 400.24 (217.99) |
| Indiana              | QALY    | 0.68 (0.04)     | 0.69 (0.02)     | 0.69 (0.04)      | 0.69 (0.04)     |
|                      | Cost    | -51.3 (0.8)     | -74.38 (1.34)   | -100.01 (0.86)   | -107.9 (1.02)   |
| Iowa                 | QALY    | 0.59 (0.05)     | 0.75 (0.01)     | 0.77 (0.05)      | 0.79 (0.05)     |
|                      | Cost    | -93.7 (1.61)    | -100.77 (1.85)  | -126.96 (0.59)   | -138.64 (1.01)  |
| Kansas               | QALY    | 33.84 (2.54)    | 34.26 (4.47)    | 35.6 (5.38)      | 36.01 (3.46)    |
|                      | Cost    | -48.61 (2)      | -93.61 (0.94)   | -123.82 (1.13)   | -137.12 (2.75)  |
| Kentucky             | QALY    | 53.61 (0.89)    | 51.14 (2.35)    | 53.95 (1.15)     | 56.56 (4.37)    |
|                      | Cost    | 174.66 (82.29)  | 163.68 (95.05)  | 160.03 (51.37)   | 157 (19.73)     |
| Louisiana            | QALY    | 74.03 (1.13)    | 75.38 (6.03)    | 79.85 (6.09)     | 83.64 (3.95)    |
|                      | Cost    | 313.66 (109.42) | 327.13 (167.4)  | 334.9 (102.66)   | 351.43 (183.69) |
| Maine                | QALY    | 2.8 (0.27)      | 3.62 (0.33)     | 3.63 (0.15)      | 3.75 (0.45)     |
|                      | Cost    | -38.5 (1.6)     | -83.18 (2.36)   | -110.83 (2.08)   | -123.23 (3.41)  |
| Maryland             | QALY    | 29.48 (0.98)    | 30.21 (0.59)    | 30.71 (1.47)     | 31.03 (0.64)    |
|                      | Cost    | -30.33 (12.79)  | -68.63 (19.44)  | -97.44 (19.51)   | -110.45 (13.61) |
| Massachusetts        | QALY    | 98.47 (3.68)    | 96.64 (3.56)    | 99.17 (2.09)     | 100.97 (4.8)    |
|                      | Cost    | 4.34 (12.21)    | -6.4 (8.99)     | -43.59 (17)      | -59.01 (8.52)   |
| Michigan             | QALY    | 97.15 (4.41)    | 102 (5.2)       | 105.44 (5.71)    | 108.23 (9.59)   |
|                      | Cost    | 344.57 (48.72)  | 349.17 (54.16)  | 337.33 (57.16)   | 334.15 (65.37)  |
| Minnesota            | QALY    | 0.52 (0.04)     | 0.59 (0.01)     | 0.61 (0.01)      | 0.6 (0.03)      |
|                      | Cost    | -76.83 (1.88)   | -109.26 (2.4)   | -144.91 (1.51)   | -160.1 (0.57)   |

**Table D.2 Continued**

| State          | Outcome | Policies         |                  |                  |                  |
|----------------|---------|------------------|------------------|------------------|------------------|
|                |         | Current          | P1               | P2               | P3               |
| Mississippi    | QALY    | 29.79 (3.63)     | 30.57 (4.5)      | 31.26 (2.33)     | 31.45 (4.97)     |
|                | Cost    | 163.09 (69.1)    | 144.69 (42.15)   | 134.34 (65.82)   | 133.26 (29.02)   |
| Missouri       | QALY    | 16.03 (0.94)     | 16.36 (2.06)     | 16.83 (0.63)     | 17.29 (0.88)     |
|                | Cost    | 61.33 (27.51)    | 33.18 (18.66)    | 17.09 (29.86)    | 11.12 (20.16)    |
| Montana        | QALY    | 0.5 (0.02)       | 0.51 (0.07)      | 0.53 (0.07)      | 0.52 (0.11)      |
|                | Cost    | -19.84 (0.75)    | -88.61 (0.53)    | -117.37 (1.83)   | -128.61 (0.72)   |
| Nebraska       | QALY    | 14.28 (0.37)     | 17 (1.13)        | 17.68 (1.32)     | 17.92 (1.2)      |
|                | Cost    | 28.8 (5.98)      | -55.63 (9.05)    | -84.17 (6.45)    | -97.98 (4.57)    |
| Nevada         | QALY    | 45.68 (2.35)     | 46.55 (2.06)     | 46.12 (5.35)     | 47.21 (5.97)     |
|                | Cost    | 94.27 (81.1)     | 70.21 (95.58)    | 53.3 (61.62)     | 45.94 (68.45)    |
| New Hampshire  | QALY    | 75.68 (5.32)     | 75.77 (2.36)     | 78.39 (5.43)     | 78.01 (8.46)     |
|                | Cost    | 219.77 (21.69)   | 197.76 (27.55)   | 184.83 (47.72)   | 176.57 (58.16)   |
| New Jersey     | QALY    | 175.73 (5.4)     | 167.72 (3.28)    | 180.14 (6.08)    | 183.95 (5.77)    |
|                | Cost    | 2398.22 (103.81) | 2356.04 (204.71) | 2432.49 (259.37) | 2448.89 (114.21) |
| New Mexico     | QALY    | 40.32 (2.61)     | 43 (4.72)        | 44.11 (5.56)     | 43.21 (1.54)     |
|                | Cost    | 19.1 (4.16)      | 9.91 (19.46)     | -6.44 (5.01)     | -15.83 (16.41)   |
| New York       | QALY    | 132.22 (0.82)    | 138.6 (5.84)     | 139.57 (7.46)    | 145.51 (2.42)    |
|                | Cost    | 1169.6 (234.66)  | 1220.65 (34.73)  | 1251.44 (99.75)  | 1292.53 (133.89) |
| North Carolina | QALY    | 19.5 (2.39)      | 19.55 (1.93)     | 19.89 (2.8)      | 19.69 (2.25)     |
|                | Cost    | -1.01 (3.68)     | -35.01 (8.67)    | -61.55 (13.97)   | -70.22 (11.87)   |
| North Dakota   | QALY    | 0.04 (0)         | 0.04 (0)         | 0.05 (0)         | 0.05 (0)         |
|                | Cost    | -70.76 (2.55)    | -113.12 (1.01)   | -148.54 (0.83)   | -163.98 (3.45)   |
| Ohio           | QALY    | 21.19 (2.59)     | 20.82 (1.13)     | 20.91 (1.54)     | 21.11 (2.43)     |
|                | Cost    | -62.2 (3.14)     | -76.32 (1.66)    | -101.93 (1.98)   | -111.59 (2.05)   |
| Oklahoma       | QALY    | 23.31 (0.56)     | 23.8 (1.6)       | 23.91 (4.24)     | 24.75 (1.6)      |
|                | Cost    | 145.32 (58.73)   | 131.39 (75.83)   | 114.62 (28.57)   | 107.29 (66.5)    |
| Oregon         | QALY    | 8.45 (1.58)      | 8.48 (1.79)      | 8.42 (1.29)      | 8.5 (0.29)       |
|                | Cost    | 38.51 (9.24)     | 22.88 (26.2)     | 7.37 (17.41)     | 0.78 (21.8)      |
| Pennsylvania   | QALY    | 73.16 (4.1)      | 75.71 (3.52)     | 76.98 (2.51)     | 78.02 (7.78)     |
|                | Cost    | 21 (5.41)        | -12.94 (40.24)   | -35.49 (9.62)    | -43.48 (33.62)   |
| Rhode Island   | QALY    | 137.68 (8.02)    | 144.85 (5.92)    | 151.89 (1.63)    | 151.28 (3.75)    |
|                | Cost    | 833.38 (104.44)  | 866.35 (65.79)   | 873.38 (143.92)  | 890.77 (110.9)   |
| South Carolina | QALY    | 22.87 (3.49)     | 23.65 (0.91)     | 23.88 (0.78)     | 24.52 (2.81)     |
|                | Cost    | -16.17 (3.68)    | -65.39 (0.88)    | -84.55 (5.09)    | -95.05 (1.27)    |
| South Dakota   | QALY    | 62.58 (4.61)     | 66.53 (3.54)     | 69.47 (5.08)     | 69.13 (3.36)     |
|                | Cost    | 170.95 (54.61)   | 117.96 (78.03)   | 96.59 (20.73)    | 88.58 (21.69)    |
| Tennessee      | QALY    | 17.33 (3.43)     | 17.43 (1.46)     | 17.64 (0.4)      | 17.49 (3.17)     |
|                | Cost    | -38.75 (1.68)    | -75.61 (0.63)    | -102.44 (0.5)    | -112.01 (0.96)   |
| Texas          | QALY    | 1.4 (0.03)       | 1.42 (0.09)      | 1.46 (0.07)      | 1.46 (0.22)      |
|                | Cost    | -28.99 (1.03)    | -75.32 (0.37)    | -100.33 (0.86)   | -108.87 (1.01)   |
| Utah           | QALY    | 0.09 (0)         | 0.1 (0.01)       | 0.11 (0.01)      | 0.12 (0.01)      |
|                | Cost    | -45.66 (0.7)     | -75.48 (1.18)    | -99.15 (0.33)    | -107.34 (1.16)   |
| Vermont        | QALY    | 68.07 (6.06)     | 68.86 (3.43)     | 70.47 (2.67)     | 70.51 (6.99)     |
|                | Cost    | 102.68 (47.39)   | 111.05 (57.21)   | 84.13 (32.68)    | 76.12 (22.53)    |
| Virginia       | QALY    | 71.41 (8.4)      | 69.77 (7.65)     | 74.08 (1.7)      | 75.91 (3.77)     |
|                | Cost    | 395.07 (58.72)   | 405.52 (146.37)  | 394.06 (146.74)  | 388.08 (134.75)  |
| Washington     | QALY    | 15.16 (1.11)     | 15.71 (2.13)     | 15.56 (1.65)     | 15.8 (1.49)      |
|                | Cost    | -71.69 (0.46)    | -98.45 (1.8)     | -125.18 (0.82)   | -141.53 (3.28)   |
| West Virginia  | QALY    | 40.36 (2.26)     | 39.38 (3.87)     | 39.8 (2.56)      | 40.45 (2.03)     |
|                | Cost    | 274.85 (109.7)   | 262.77 (34.83)   | 243.79 (68.19)   | 253.43 (78.85)   |
| Wisconsin      | QALY    | 4.6 (0.91)       | 4.67 (0.92)      | 4.6 (0.25)       | 4.75 (0.23)      |
|                | Cost    | -36.08 (6.91)    | -60.39 (2.74)    | -90.35 (4.25)    | -102.72 (5.84)   |
| Wyoming        | QALY    | 14.25 (2.2)      | 13.82 (1.13)     | 13.99 (0.8)      | 14.35 (2.03)     |
|                | Cost    | -67.76 (2.57)    | -102.26 (2.93)   | -136.16 (3.21)   | -150.56 (3.54)   |

**Table D.3 Avg (std dev) of outcomes compared to no-intervention per 100K high-risk capita**  
**Outcomes: QALY gained (1,000 years) and extra cost (\$ million)**  
**High risk: age $\geq$ 65 and Black/Hispanic race**

| State                | Outcome | Policies       |                 |                 |                |
|----------------------|---------|----------------|-----------------|-----------------|----------------|
|                      |         | Current        | P1              | P2              | P3             |
| Alabama              | QALY    | 0.36 (0.05)    | 0.39 (0.05)     | 0.41 (0.06)     | 0.41 (0.07)    |
|                      | Cost    | -31.86 (0.56)  | -88.9 (0.68)    | -106.66 (1.7)   | -113.7 (2.01)  |
| Alaska               | QALY    | 22.3 (2.56)    | 22.77 (5.2)     | 23.18 (1.55)    | 23.49 (4.75)   |
|                      | Cost    | -85.16 (1.11)  | -121.71 (2.95)  | -149.04 (2.82)  | -160.25 (0.72) |
| Arizona              | QALY    | 1.04 (0.01)    | 2.25 (0.12)     | 2.41 (0.08)     | 2.49 (0.09)    |
|                      | Cost    | -60.94 (1.1)   | -77.78 (0.7)    | -96.08 (1.03)   | -103.16 (1.01) |
| Arkansas             | QALY    | 42.31 (2.01)   | 42.06 (6.69)    | 43.39 (1.43)    | 44.6 (5.99)    |
|                      | Cost    | -52.33 (1.63)  | -74.54 (1.39)   | -92.2 (1.12)    | -99.48 (0.68)  |
| California           | QALY    | 42.88 (5.46)   | 42.2 (1.51)     | 42.79 (5.7)     | 43.16 (1.86)   |
|                      | Cost    | -20.36 (2.8)   | -18.6 (12.58)   | -39.98 (4.2)    | -47.86 (13.25) |
| Colorado             | QALY    | 13.41 (1.64)   | 13.44 (0.75)    | 13.56 (1.17)    | 13.62 (0.58)   |
|                      | Cost    | -66.21 (1.33)  | -103.06 (3.29)  | -127.73 (1.34)  | -136.11 (1.15) |
| Connecticut          | QALY    | 232.6 (14.42)  | 239.21 (12.39)  | 249.44 (2.28)   | 259.99 (1.76)  |
|                      | Cost    | 390.68 (51.39) | 382.24 (143.73) | 357.39 (160.94) | 350.71 (139)   |
| Delaware             | QALY    | 97.75 (1.28)   | 98.07 (1.21)    | 98.58 (7.99)    | 98.89 (1.48)   |
|                      | Cost    | 98.77 (5.6)    | 84.38 (8.16)    | 61.05 (14.16)   | 50.81 (23.84)  |
| District of Columbia | QALY    | 138.91 (6.46)  | 157.07 (8.24)   | 174.33 (6.65)   | 193.21 (1.58)  |
|                      | Cost    | 617.18 (43.81) | 590.26 (160.55) | 556.79 (172.23) | 559.66 (70.51) |
| Florida              | QALY    | 22.65 (3.2)    | 23.07 (1.28)    | 23.28 (2.56)    | 23.42 (5.24)   |
|                      | Cost    | -51.14 (0.68)  | -97.82 (1.07)   | -117.43 (2.16)  | -125.13 (1.79) |
| Georgia              | QALY    | 54.57 (5.69)   | 56.44 (5.19)    | 57.68 (3.37)    | 58.51 (1.08)   |
|                      | Cost    | -31.75 (6.39)  | -77.12 (2.11)   | -95.81 (5.13)   | -103.36 (3.77) |
| Hawaii               | QALY    | 0.03 (0)       | 0.03 (0)        | 0.03 (0)        | 0.03 (0)       |
|                      | Cost    | -87.7 (1)      | -105.53 (1.14)  | -131.09 (1.32)  | -141.81 (0.51) |
| Idaho                | QALY    | 134.42 (2.51)  | 135.77 (6.04)   | 137.75 (4.32)   | 139.27 (12.3)  |
|                      | Cost    | -55.21 (1.54)  | -79.88 (1.07)   | -97.15 (1.5)    | -105.1 (0.25)  |
| Illinois             | QALY    | 153.78 (5.13)  | 156.73 (8.91)   | 163.34 (12.19)  | 169.41 (12.45) |
|                      | Cost    | 23.14 (48.76)  | 9.85 (51.66)    | -12.31 (7.32)   | -20.22 (26.72) |
| Indiana              | QALY    | 0.82 (0.02)    | 0.83 (0.01)     | 0.84 (0.01)     | 0.84 (0.02)    |
|                      | Cost    | -57.9 (0.96)   | -80.97 (0.51)   | -99.52 (0.43)   | -107.02 (2.4)  |
| Iowa                 | QALY    | 1.03 (0.07)    | 1.28 (0.1)      | 1.33 (0.04)     | 1.35 (0.09)    |
|                      | Cost    | -113.26 (0.63) | -123.7 (1.9)    | -148.09 (0.91)  | -158.75 (1.62) |
| Kansas               | QALY    | 63.98 (7.43)   | 65.58 (9.06)    | 66.83 (9.88)    | 67.75 (6.62)   |
|                      | Cost    | -58.3 (1.63)   | -98.09 (1.73)   | -122.25 (1.29)  | -132.17 (2.01) |
| Kentucky             | QALY    | 82.14 (3.88)   | 80.48 (2.03)    | 83.2 (3.61)     | 85.41 (11.17)  |
|                      | Cost    | -58.49 (0.87)  | -65.72 (2.88)   | -83.24 (0.71)   | -89.78 (3.55)  |
| Louisiana            | QALY    | 105.21 (7.75)  | 107.34 (8.12)   | 115.66 (1.4)    | 123.41 (7.9)   |
|                      | Cost    | -7.17 (16.27)  | -21.33 (20.12)  | -37.87 (13.32)  | -44.18 (30.28) |
| Maine                | QALY    | 4.15 (0.24)    | 5.24 (0.19)     | 5.35 (0.61)     | 5.43 (0.4)     |
|                      | Cost    | -58.55 (1.84)  | -104.8 (0.41)   | -127.74 (1.59)  | -137.41 (2.77) |
| Maryland             | QALY    | 49.43 (4.69)   | 50.34 (6.56)    | 50.99 (4.11)    | 51.41 (3.86)   |
|                      | Cost    | -76.48 (2.54)  | -124.3 (0.76)   | -153.23 (1.77)  | -165.32 (3.24) |
| Massachusetts        | QALY    | 163.55 (3.52)  | 163.12 (2.5)    | 166.96 (4.34)   | 170.33 (2.52)  |
|                      | Cost    | -97.21 (1.96)  | -112.26 (3.03)  | -143.61 (4.82)  | -156.72 (0.8)  |
| Michigan             | QALY    | 125.61 (8.23)  | 130.95 (4.01)   | 134.72 (3.93)   | 137.72 (11.22) |
|                      | Cost    | -39.25 (12.3)  | -61.75 (8.53)   | -81.37 (14.9)   | -88.77 (10.56) |
| Minnesota            | QALY    | 0.68 (0.04)    | 0.76 (0.03)     | 0.78 (0.04)     | 0.79 (0.04)    |
|                      | Cost    | -96.15 (0.9)   | -131.43 (1.97)  | -160.94 (3.04)  | -172.89 (3.62) |

**Table D.3 Continued**

| State          | Outcome | Policies        |                 |                 |                 |
|----------------|---------|-----------------|-----------------|-----------------|-----------------|
|                |         | Current         | P1              | P2              | P3              |
| Mississippi    | QALY    | 36.13 (3.23)    | 36.67 (3.47)    | 37.55 (2.76)    | 38.14 (1.01)    |
|                | Cost    | -9.33 (17.04)   | -42.83 (2.01)   | -57.18 (12.63)  | -63.36 (11.94)  |
| Missouri       | QALY    | 18.64 (1.14)    | 18.99 (1.61)    | 19.32 (1.12)    | 19.52 (2.99)    |
|                | Cost    | -27.66 (3.1)    | -73.27 (0.95)   | -94.7 (3.42)    | -102.63 (2.12)  |
| Montana        | QALY    | 40.2 (2.44)     | 43.57 (4.15)    | 44.56 (3.75)    | 45.12 (2.88)    |
|                | Cost    | -12.97 (4.58)   | -68.33 (3.09)   | -90.5 (5.26)    | -99.12 (4.16)   |
| Nebraska       | QALY    | 23.8 (2.11)     | 28.81 (2.41)    | 29.75 (0.78)    | 30.33 (1.4)     |
|                | Cost    | -8.69 (1.71)    | -104.31 (1.58)  | -129.02 (1.74)  | -138.35 (1.97)  |
| Nevada         | QALY    | 64.74 (4.65)    | 65.74 (5.91)    | 66.44 (1.08)    | 66.88 (2.02)    |
|                | Cost    | -18.96 (2.59)   | -60.2 (6.74)    | -81.42 (6.18)   | -90.46 (12.19)  |
| New Hampshire  | QALY    | 128.66 (11.56)  | 131.52 (9.23)   | 133.09 (5.86)   | 134.29 (10.8)   |
|                | Cost    | -60.64 (2.51)   | -96.41 (11.8)   | -125.32 (15.96) | -136.15 (12.31) |
| New Jersey     | QALY    | 223.9 (10.15)   | 212.61 (2.7)    | 224.28 (2.43)   | 234.26 (6.68)   |
|                | Cost    | 890.68 (157.74) | 883.45 (171.14) | 874.07 (86.49)  | 874.47 (142.34) |
| New Mexico     | QALY    | 66.39 (4.11)    | 69.69 (1.39)    | 71.04 (8.27)    | 72.11 (2.84)    |
|                | Cost    | -20.66 (6.52)   | -35.5 (13.09)   | -52.4 (5.17)    | -58.95 (19.35)  |
| New York       | QALY    | 179.76 (1.54)   | 184.74 (4.74)   | 190.67 (8.49)   | 196.04 (5.88)   |
|                | Cost    | 231.17 (46.35)  | 218.7 (38.19)   | 197.86 (26.51)  | 190.82 (48.66)  |
| North Carolina | QALY    | 34.31 (1.54)    | 34.91 (5.26)    | 35.31 (5.73)    | 35.57 (5.49)    |
|                | Cost    | -39.14 (3.84)   | -73.28 (3.97)   | -92.28 (3.52)   | -100.11 (1.64)  |
| North Dakota   | QALY    | 0.06 (0.01)     | 0.06 (0.01)     | 0.06 (0.01)     | 0.06 (0)        |
|                | Cost    | -83.12 (2.27)   | -125.46 (1.36)  | -152.1 (2.73)   | -164.14 (2.86)  |
| Ohio           | QALY    | 33.37 (2.28)    | 33.61 (2.03)    | 34.03 (0.58)    | 34.32 (1.95)    |
|                | Cost    | -74.59 (1.93)   | -90.96 (0.89)   | -111.87 (1.71)  | -120.73 (0.44)  |
| Oklahoma       | QALY    | 55.57 (6.71)    | 56.14 (7.42)    | 56.89 (5.19)    | 57.36 (3.05)    |
|                | Cost    | -12.44 (9.79)   | -39.18 (6.61)   | -57.21 (20.82)  | -64.43 (4.9)    |
| Oregon         | QALY    | 14.82 (2.89)    | 14.91 (1.84)    | 15.04 (1.01)    | 15.12 (1.75)    |
|                | Cost    | -52.08 (2.21)   | -75.97 (4.27)   | -97.91 (4.12)   | -107.09 (6.58)  |
| Pennsylvania   | QALY    | 124.52 (7.21)   | 128.82 (6.07)   | 131.14 (9.36)   | 133.04 (8.72)   |
|                | Cost    | -60.73 (1.87)   | -103.07 (5.4)   | -125.67 (4.39)  | -132.71 (3.51)  |
| Rhode Island   | QALY    | 188.04 (11.9)   | 198.46 (9.19)   | 201.98 (12.96)  | 205.02 (8.66)   |
|                | Cost    | 347.53 (50.53)  | 318.08 (43.38)  | 295.22 (88.05)  | 286.91 (85.49)  |
| South Carolina | QALY    | 48.1 (1.51)     | 49.5 (1.26)     | 50.02 (6)       | 50.38 (4.39)    |
|                | Cost    | -35.6 (1.21)    | -84.12 (0.73)   | -100.57 (1.47)  | -107.78 (1.41)  |
| South Dakota   | QALY    | 108.67 (9.33)   | 113.56 (4.95)   | 115.69 (5.86)   | 117.22 (7)      |
|                | Cost    | -16.72 (4.61)   | -99.19 (0.58)   | -123.24 (0.96)  | -133.17 (3.21)  |
| Tennessee      | QALY    | 21.34 (2.04)    | 21.57 (3.37)    | 21.8 (3.77)     | 21.94 (2.65)    |
|                | Cost    | -44.34 (1.09)   | -81.65 (0.79)   | -103.14 (1.69)  | -113.39 (0.89)  |
| Texas          | QALY    | 2.21 (0.08)     | 2.24 (0.39)     | 2.3 (0.41)      | 2.34 (0.15)     |
|                | Cost    | -34.43 (0.47)   | -75.18 (0.66)   | -94.35 (0.9)    | -102.27 (2.37)  |
| Utah           | QALY    | 0.13 (0)        | 0.15 (0.01)     | 0.16 (0.01)     | 0.17 (0.02)     |
|                | Cost    | -64.35 (0.7)    | -92.51 (0.18)   | -112.77 (1.08)  | -120.83 (1)     |
| Vermont        | QALY    | 98.43 (2.98)    | 97.21 (7.03)    | 98.96 (4.19)    | 100.26 (10.63)  |
|                | Cost    | -84.85 (1.2)    | -86.99 (8.25)   | -114.97 (6.19)  | -125.98 (1.54)  |
| Virginia       | QALY    | 99.69 (4.25)    | 99.73 (4.17)    | 102.34 (4.96)   | 104.28 (10.43)  |
|                | Cost    | 195.92 (80.73)  | 176.21 (12.42)  | 149.1 (14.38)   | 137.9 (83.68)   |
| Washington     | QALY    | 31.08 (3.01)    | 31.34 (4.82)    | 31.51 (1)       | 31.63 (1.71)    |
|                | Cost    | -95.42 (0.33)   | -120.34 (1.66)  | -145.58 (0.91)  | -155.56 (2.66)  |
| West Virginia  | QALY    | 47.92 (5.51)    | 48.12 (6.65)    | 48.42 (6.43)    | 48.63 (1.25)    |
|                | Cost    | -20.61 (7.48)   | -38.81 (7.71)   | -54.24 (1.5)    | -60.11 (7.09)   |
| Wisconsin      | QALY    | 6.25 (0.48)     | 6.3 (0.18)      | 6.4 (0.37)      | 6.46 (0.93)     |
|                | Cost    | -68.2 (0.98)    | -92.17 (2.15)   | -115.24 (2.69)  | -124.07 (1.3)   |
| Wyoming        | QALY    | 23.12 (2.74)    | 23.19 (3.62)    | 23.33 (0.85)    | 23.43 (1.72)    |
|                | Cost    | -81.51 (0.83)   | -117.6 (0.43)   | -143.74 (0.32)  | -155.09 (1.64)  |

**D.4. Cost-effectiveness probability**

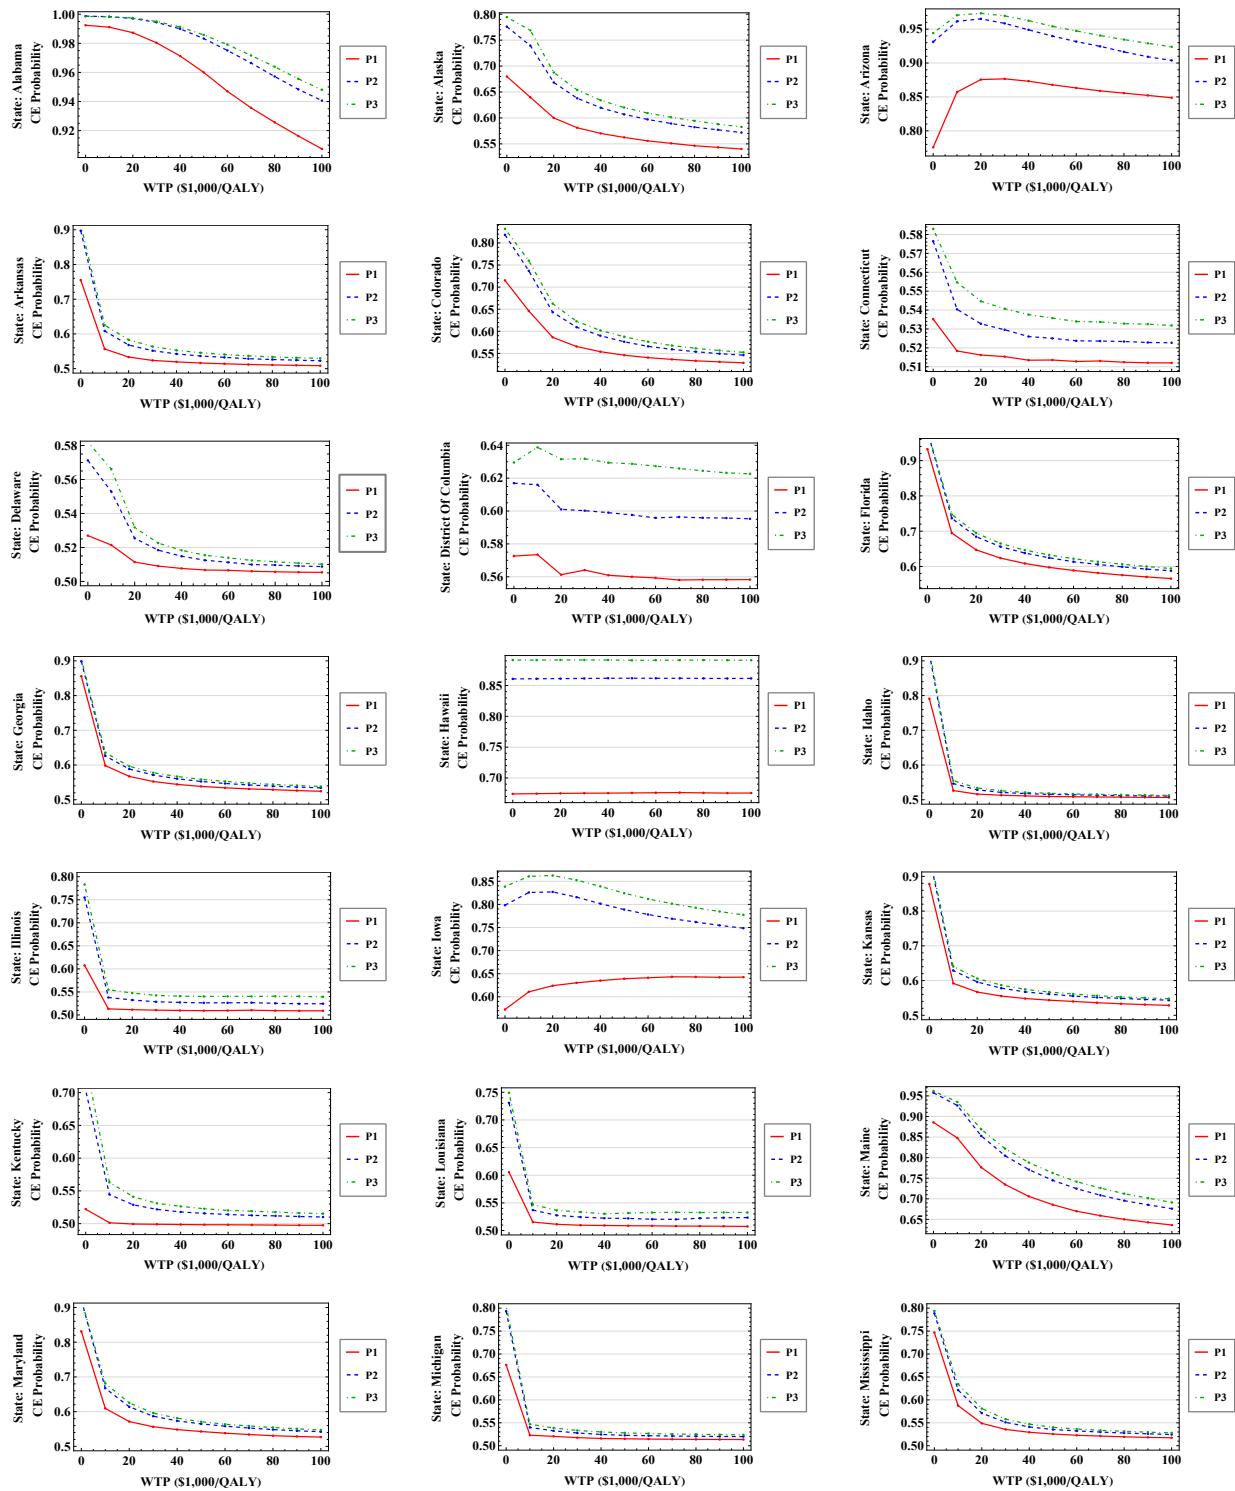

**Figure D.1** (Color online) Cost-effectiveness probability of potential policies compared to the current policies

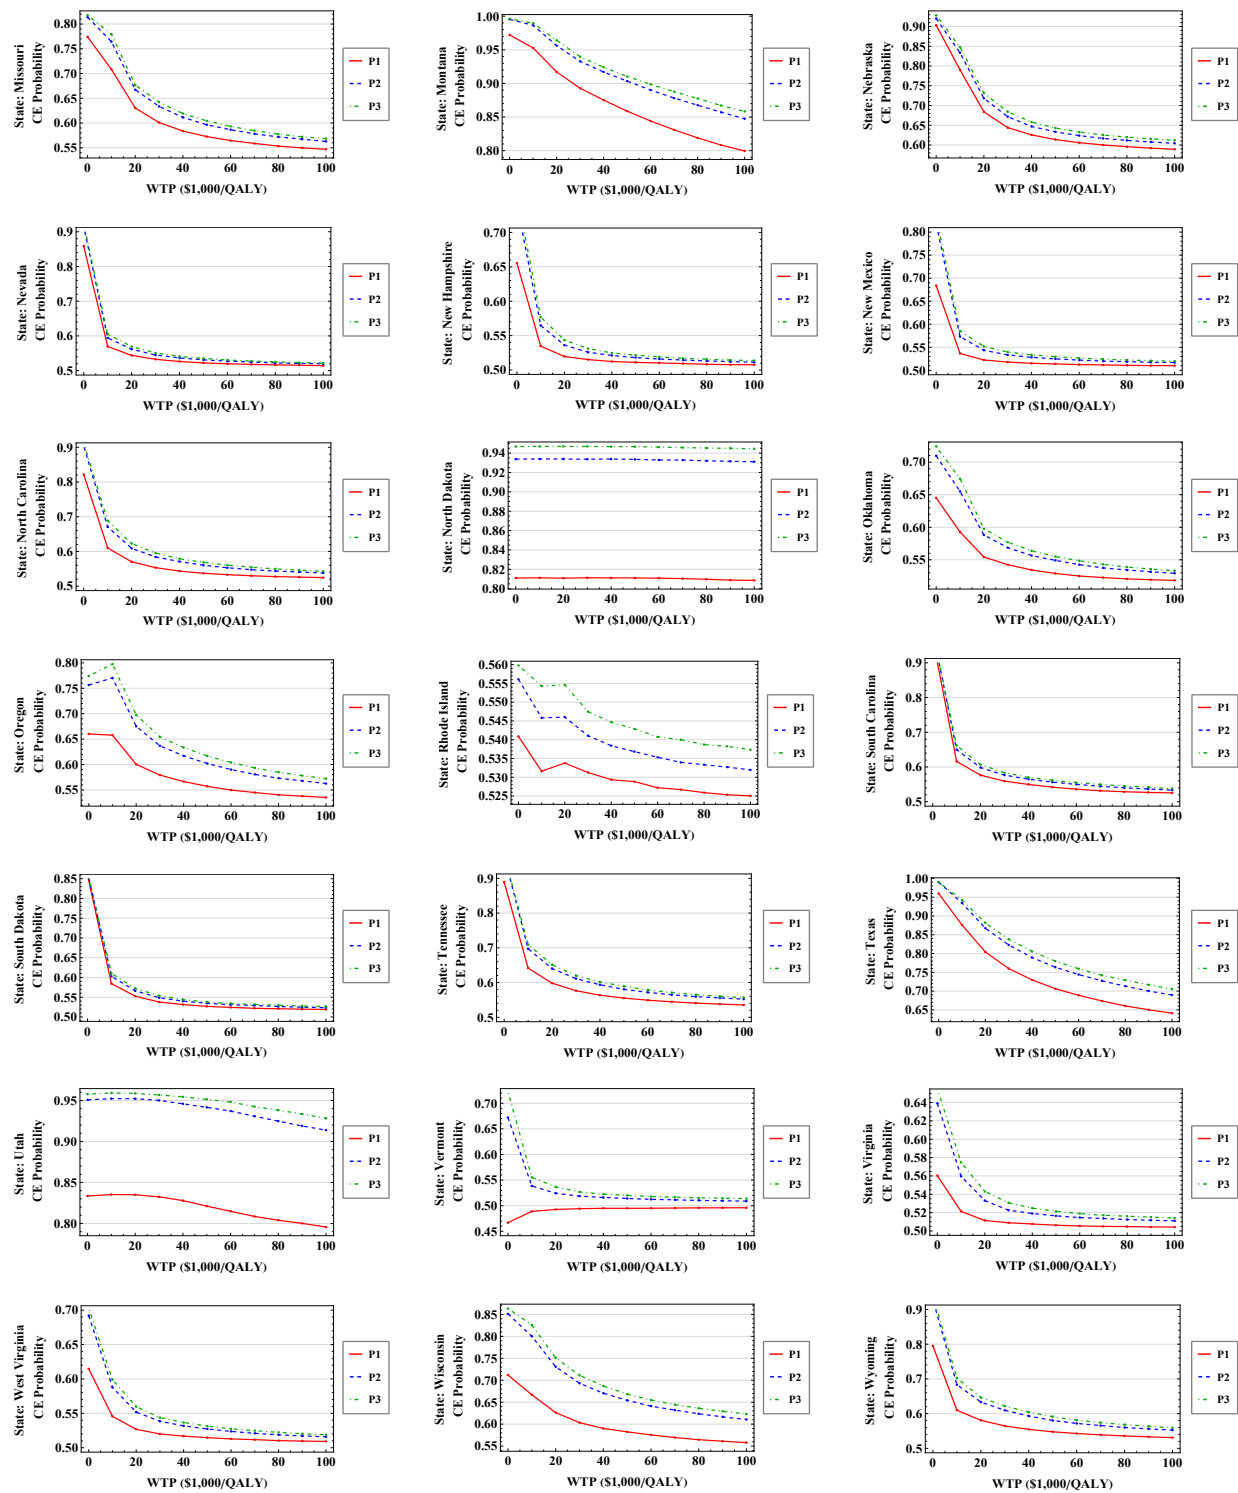

Figure D.1 Continued

### D.5. Aversions in Health Outcomes

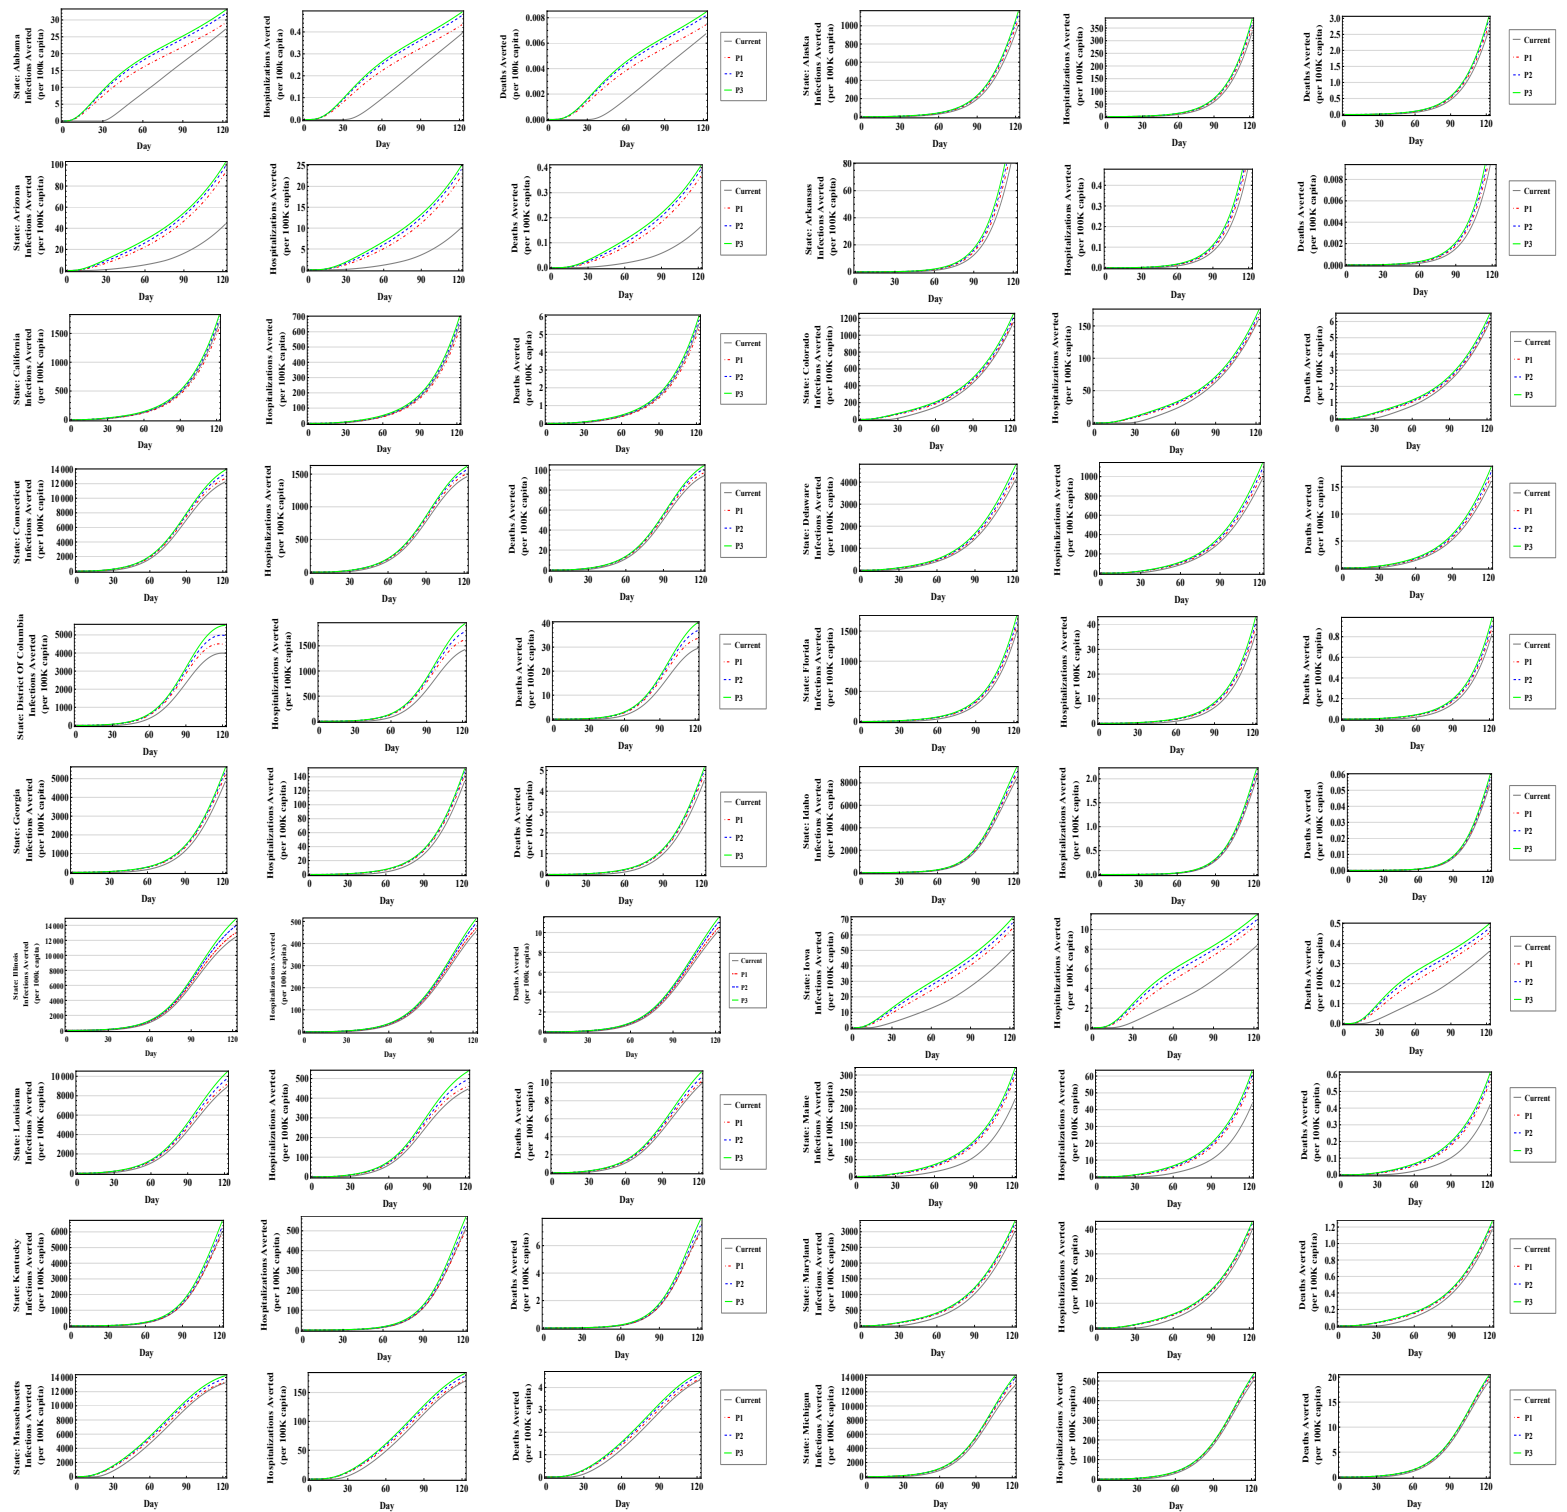

**Figure D.2 (Color online) Average number of aversions in health outcomes under different intervention policies compared to no-intervention**

*Notes.* In each row, the results in every three plots belong to one state.

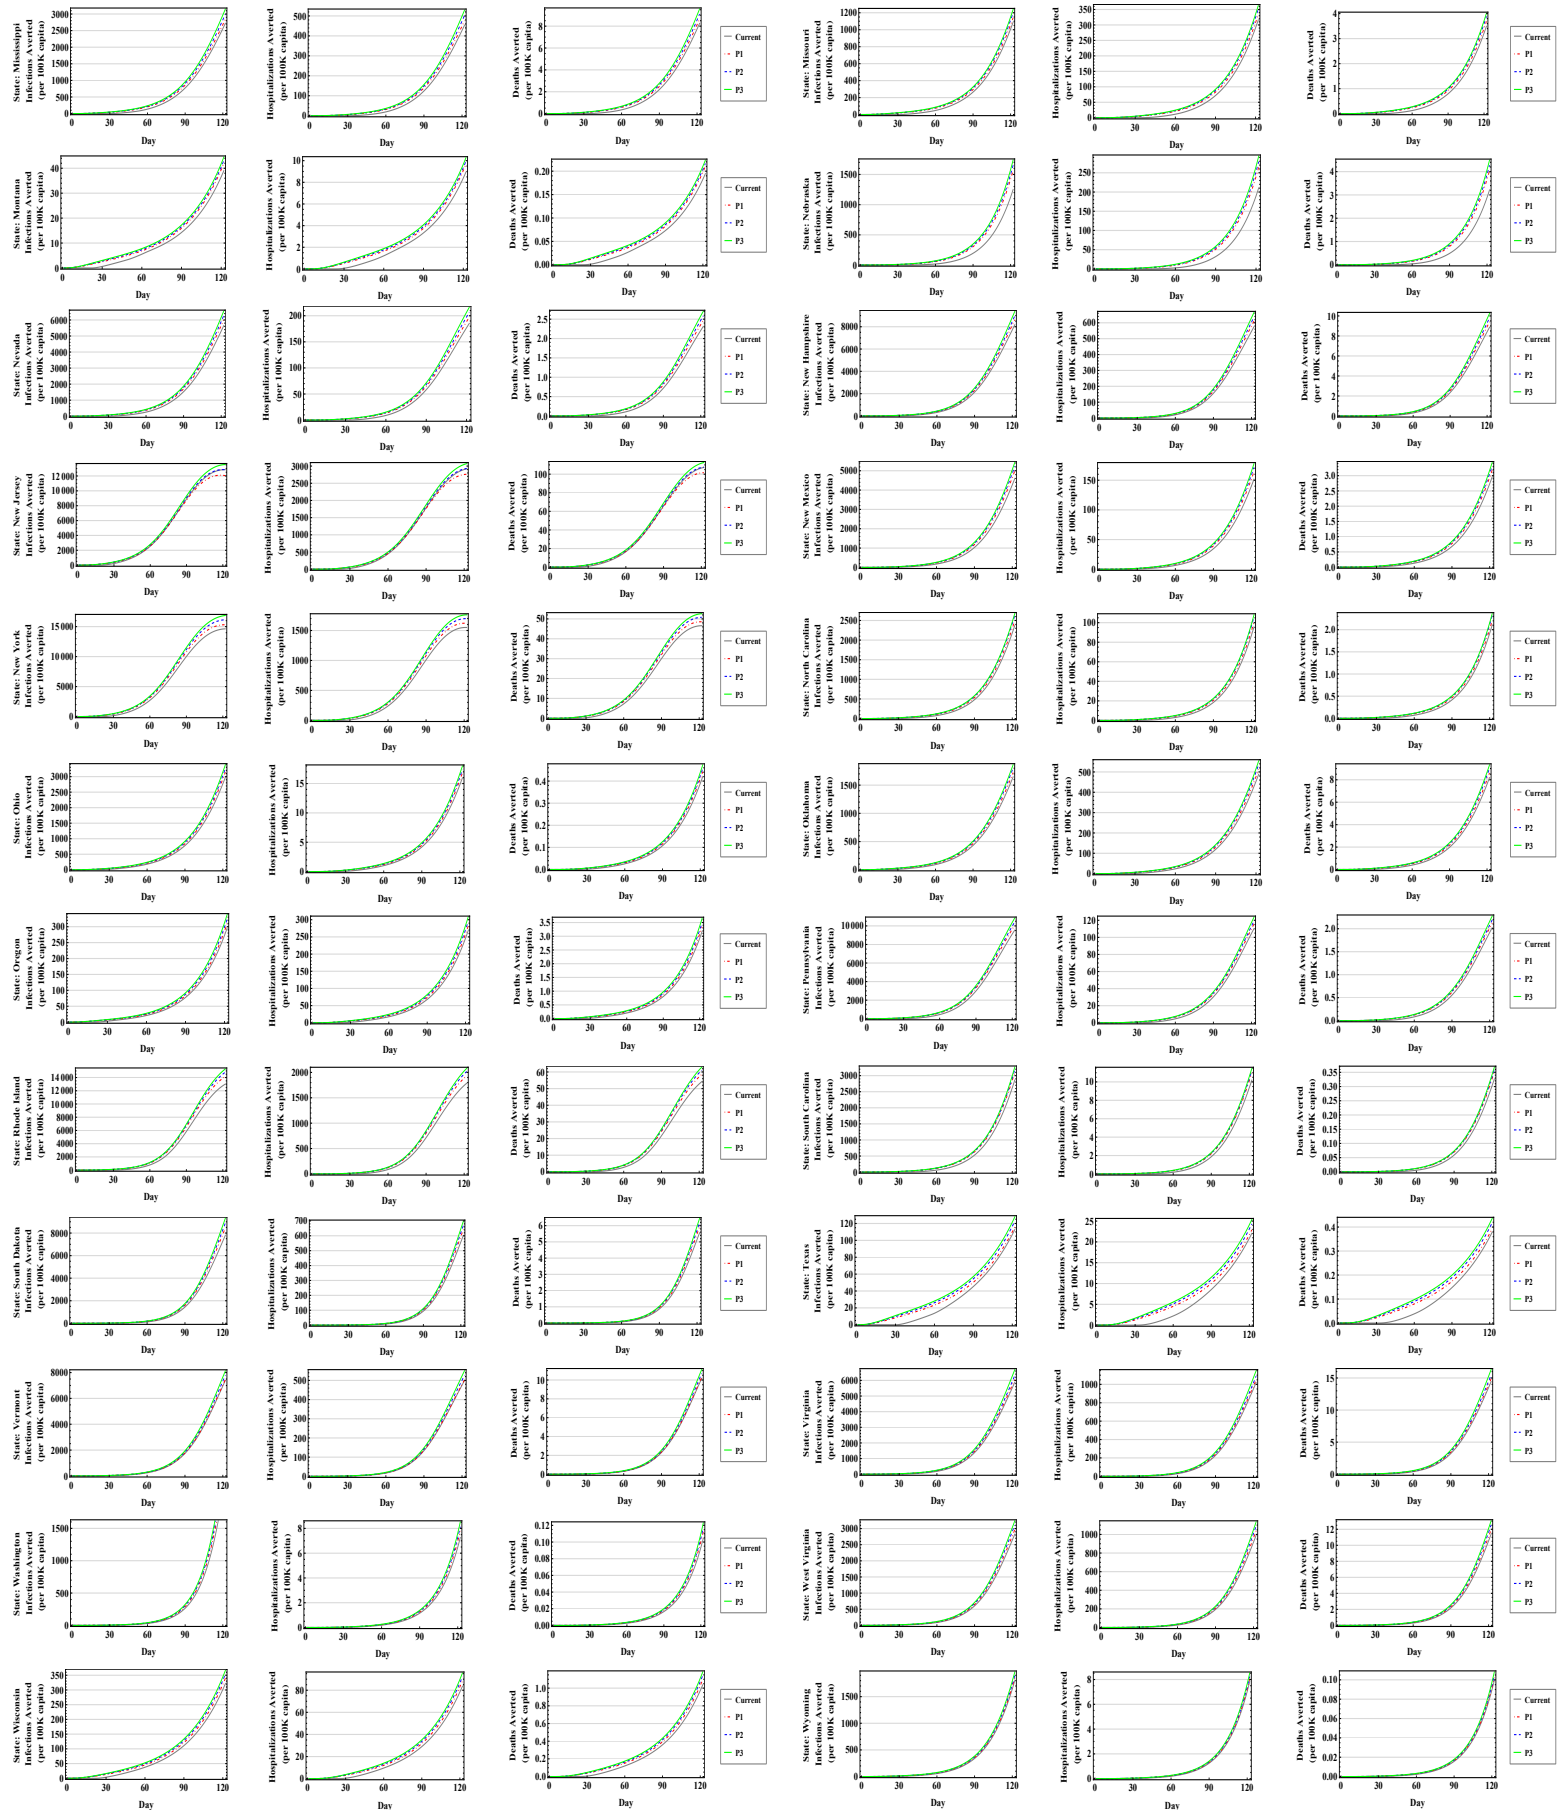

Figure D.2 Continued

## APPENDIX E. Robustness Checks

**E.1. qol scores.** For the case where qol scores are lower than those in Equation (EC.1), we have:

$$q_i = \begin{cases} 1.0, & \text{if } i \in \{1, 11\} & \text{Compartment(s): susceptible, recovered,} \\ x \in [0.75, 0.85], & \text{if } i = 2 & \text{Compartment(s): exposed/presymptomatic,} \\ x \in [0.65, 0.75], & \text{if } i = 3 & \text{Compartment(s): infected asymptomatic,} \\ x \in [0.55, 0.65], & \text{if } i = 4 & \text{Compartment(s): infected symptomatic,} \\ x \in [0.45, 0.55], & \text{if } i = 5 & \text{Compartment(s): infected hospitalized (common bed),} \\ x \in [0.25, 0.35], & \text{if } i = 6 & \text{Compartment(s): infected hospitalized (ICU bed),} \\ x \in [0.05, 0.15], & \text{if } i = 7 & \text{Compartment(s): infected hospitalized (ICU bed \& ventilator),} \\ x \in [0.65, 0.75], & \text{if } i = 8 & \text{Compartment(s): carrier post discharge (was hospitalized common bed),} \\ x \in [0.55, 0.65], & \text{if } i = 9 & \text{Compartment(s): carrier post discharge (was hospitalized ICU bed),} \\ x \in [0.45, 0.55], & \text{if } i = 10 & \text{Compartment(s): carrier post discharge (was hospitalized ICU bed \& ventilator),} \\ 0.0, & \text{if } i = 12 & \text{Compartment(s): dead.} \end{cases} \quad (\text{EC.3})$$

Furthermore, for the case where qol scores are higher than those in Equation (EC.1), we have:

$$q_i = \begin{cases} 1.0, & \text{if } i \in \{1, 11\} & \text{Compartment(s): susceptible, recovered,} \\ x \in [0.95, 1.0], & \text{if } i = 2 & \text{Compartment(s): exposed/presymptomatic,} \\ x \in [0.85, 0.95], & \text{if } i = 3 & \text{Compartment(s): infected asymptomatic,} \\ x \in [0.75, 0.85], & \text{if } i = 4 & \text{Compartment(s): infected symptomatic,} \\ x \in [0.65, 0.75], & \text{if } i = 5 & \text{Compartment(s): infected hospitalized (common bed),} \\ x \in [0.45, 0.55], & \text{if } i = 6 & \text{Compartment(s): infected hospitalized (ICU bed),} \\ x \in [0.25, 0.35], & \text{if } i = 7 & \text{Compartment(s): infected hospitalized (ICU bed \& ventilator),} \\ x \in [0.85, 0.95], & \text{if } i = 8 & \text{Compartment(s): carrier post discharge (was hospitalized common bed),} \\ x \in [0.75, 0.85], & \text{if } i = 9 & \text{Compartment(s): carrier post discharge (was hospitalized ICU bed),} \\ x \in [0.65, 0.75], & \text{if } i = 10 & \text{Compartment(s): carrier post discharge (was hospitalized ICU bed \& ventilator),} \\ 0.0, & \text{if } i = 12 & \text{Compartment(s): dead.} \end{cases} \quad (\text{EC.4})$$

Table E.1 shows the results.

**E.2. Proportion of population with lost income.** We consider two alternative scenarios:

$$(p_1(t), p_2(t), p_3(t), p_4(t)) = \begin{cases} (50\%, 25\%, 15\%, 10\%), & \text{under Policy 1: if } 1 \leq t \leq 61, \\ (65\%, 20\%, 10\%, 5\%), & \text{under Policy 1: if } 62 \leq t \leq 92, \\ (80\%, 10\%, 4\%, 8\%), & \text{under Policy 1: if } 93 \leq t \leq 122, \\ (50\%, 25\%, 15\%, 10\%), & \text{under Policy 2: if } 1 \leq t \leq 92, \\ (65\%, 20\%, 10\%, 5\%), & \text{under Policy 2: if } 93 \leq t \leq 122, \\ (50\%, 25\%, 15\%, 10\%), & \text{under Policy 3: if } 1 \leq t \leq 122, \end{cases} \quad (\text{EC.5})$$

$$(p_1(t), p_2(t), p_3(t), p_4(t)) = \begin{cases} (30\%, 30\%, 20\%, 20\%), & \text{under Policy 1: if } 1 \leq t \leq 61, \\ (45\%, 25\%, 15\%, 15\%), & \text{under Policy 1: if } 62 \leq t \leq 92, \\ (60\%, 20\%, 10\%, 10\%), & \text{under Policy 1: if } 93 \leq t \leq 122, \\ (30\%, 30\%, 20\%, 20\%), & \text{under Policy 2: if } 1 \leq t \leq 92, \\ (45\%, 25\%, 15\%, 15\%), & \text{under Policy 2: if } 93 \leq t \leq 122, \\ (30\%, 30\%, 20\%, 20\%), & \text{under Policy 3: if } 1 \leq t \leq 122, \end{cases} \quad (\text{EC.6})$$

Compared to the baseline scenario in Equation (EC.2), Equation (EC.5) increases the ratio of population who lost less than 50% of their income, while Equation (EC.6) does the reverse. Also, it should be noted that, in all of our simulations, we consider a  $\pm 10\%$  variation based on the corresponding values for  $p_j$ 's. Table E.2 shows the results.

**E.3. Projected infections.** Table E.3 shows the results.

**E.4. Population risk perception.** Table E.4 shows the results.

**E.5. Proportion Losing Income.** Table E.5 shows the results.

**E.6. Proportion quarantining.** Table E.6 shows the results.

**E.7. Capacity level of hospital resources.** Table E.7 shows the results.

**Table E.1 Robustness check: qol (shaded area represents the results under the baseline scenario) Avg (std dev) of outcomes compared to no-intervention per 100K capita Outcomes: QALY gained (1,000 years) and extra cost (\$ million)**

| State              | Outcome | Scenario 1: qol below baseline, Eq (EC.3) |                 |                 |                 |                 | Scenario 2: qol baseline, Eq (EC.1) |                 |                 |                 |                 | Scenario 3: qol above baseline, Eq (EC.4) |                 |                 |                 |  |
|--------------------|---------|-------------------------------------------|-----------------|-----------------|-----------------|-----------------|-------------------------------------|-----------------|-----------------|-----------------|-----------------|-------------------------------------------|-----------------|-----------------|-----------------|--|
|                    |         | Policies                                  |                 |                 |                 |                 | Policies                            |                 |                 |                 |                 | Policies                                  |                 |                 |                 |  |
|                    |         | Current                                   | P1              | P2              | P3              | P3              | Current                             | P1              | P2              | P3              | P3              | Current                                   | P1              | P2              | P3              |  |
| Arizona (AZ)       | QALY    | 0.78 (0.03)                               | 1.74 (0.05)     | 1.87 (0.06)     | 1.92 (0.09)     | 1.92 (0.09)     | 0.6 (0.04)                          | 1.29 (0.04)     | 1.41 (0.03)     | 1.44 (0.08)     | 1.44 (0.08)     | 0.33 (0.02)                               | 0.75 (0.03)     | 0.8 (0.04)      | 0.84 (0.03)     |  |
|                    | Cost    | -52 (1.04)                                | -73.97 (0.85)   | -94.25 (1.17)   | -106.44 (1.71)  | -106.44 (1.71)  | -44.52 (1.4)                        | -68 (0.52)      | -91.39 (0.72)   | -99.11 (1.23)   | -99.11 (1.23)   | -48.42 (0.81)                             | -69.82 (0.75)   | -91.8 (1.21)    | -101.69 (1.89)  |  |
| California (CA)    | QALY    | 50.55 (0.83)                              | 50.16 (5.68)    | 50.58 (4.52)    | 50.59 (4.48)    | 50.59 (4.48)    | 26.53 (3.51)                        | 26.1 (3.76)     | 26.48 (3.59)    | 26.71 (2.95)    | 26.71 (2.95)    | 15.4 (1.23)                               | 15.36 (1.46)    | 15.37 (0.7)     | 15.64 (2.22)    |  |
|                    | Cost    | 241.29 (100.44)                           | 245.63 (65.69)  | 233.1 (70.18)   | 217.04 (60.24)  | 217.04 (60.24)  | 192.39 (38.96)                      | 197.9 (17.52)   | 176.85 (9.9)    | 167.97 (53.27)  | 167.97 (53.27)  | 141.55 (53.64)                            | 148.03 (9.34)   | 126.71 (39.21)  | 119.17 (49.96)  |  |
| Georgia (GA)       | QALY    | 53.5 (6.01)                               | 54.98 (3.6)     | 57.05 (2.8)     | 58.64 (3.87)    | 58.64 (3.87)    | 36.07 (2.78)                        | 37.41 (4.21)    | 38.29 (1.1)     | 38.89 (2.28)    | 38.89 (2.28)    | 18.71 (1.83)                              | 18.79 (2.79)    | 19.44 (2.43)    | 20.02 (2.74)    |  |
|                    | Cost    | 14.09 (9.65)                              | -25.08 (18.04)  | -49.12 (9.21)   | -58.99 (4.59)   | -58.99 (4.59)   | 20.91 (9.11)                        | -15.66 (11.25)  | -36.03 (15.08)  | -43.86 (2.76)   | -43.86 (2.76)   | 17.8 (12.07)                              | -14.63 (27.37)  | -39.31 (33.35)  | -49.06 (33.13)  |  |
| Maryland (MD)      | QALY    | 54.65 (4.31)                              | 54.45 (3.2)     | 55.71 (5.72)    | 56.56 (4.6)     | 56.56 (4.6)     | 29.48 (0.98)                        | 30.21 (0.59)    | 30.71 (1.47)    | 31.03 (0.64)    | 31.03 (0.64)    | 11.01 (1.27)                              | 11.13 (1.84)    | 11.48 (1.26)    | 11.31 (0.53)    |  |
|                    | Cost    | -46.91 (4.55)                             | -93.89 (1.64)   | -126.85 (8.59)  | -142.6 (8.28)   | -142.6 (8.28)   | -30.33 (12.79)                      | -68.63 (19.44)  | -97.44 (19.51)  | -110.45 (13.61) | -110.45 (13.61) | -55.45 (2.55)                             | -105.25 (2.84)  | -137.17 (3.41)  | -151.92 (0.86)  |  |
| Massachusetts (MA) | QALY    | 147.74 (7.96)                             | 148.16 (6.82)   | 150.16 (4.12)   | 152.73 (7.54)   | 152.73 (7.54)   | 98.47 (3.68)                        | 96.64 (3.56)    | 99.17 (2.09)    | 100.97 (4.8)    | 100.97 (4.8)    | 56.21 (1.49)                              | 57.83 (0.73)    | 59.31 (2.9)     | 60.8 (3.58)     |  |
|                    | Cost    | 30.24 (8.93)                              | 24.87 (6.61)    | 1.21 (21.48)    | -14.06 (3.51)   | -14.06 (3.51)   | 4.34 (12.21)                        | -6.4 (8.99)     | -43.59 (17)     | -59.01 (8.52)   | -59.01 (8.52)   | 32.37 (5.4)                               | 27.13 (22.22)   | 3.5 (6.97)      | -9.01 (9.57)    |  |
| Michigan (MI)      | QALY    | 140.89 (11.66)                            | 149.15 (12.15)  | 155.2 (8.86)    | 155.02 (5.32)   | 155.02 (5.32)   | 97.15 (4.41)                        | 102 (5.2)       | 105.44 (5.71)   | 108.23 (9.59)   | 108.23 (9.59)   | 55.21 (2.62)                              | 56.21 (1.37)    | 59.85 (5.63)    | 60.18 (3.65)    |  |
|                    | Cost    | 210.29 (12.97)                            | 199.44 (14.16)  | 187.08 (77.78)  | 182.05 (98.88)  | 182.05 (98.88)  | 344.57 (48.72)                      | 349.17 (54.16)  | 337.33 (57.16)  | 334.15 (65.37)  | 334.15 (65.37)  | 189.07 (29.47)                            | 181.3 (24.9)    | 159.17 (66.87)  | 158.97 (64.49)  |  |
| New York (NY)      | QALY    | 212.43 (1.14)                             | 213.19 (6.72)   | 219.61 (3.21)   | 228.71 (5.83)   | 228.71 (5.83)   | 132.22 (0.82)                       | 138.6 (5.84)    | 139.57 (7.46)   | 145.51 (2.42)   | 145.51 (2.42)   | 81.28 (2.64)                              | 84.62 (3.02)    | 88.21 (1.59)    | 89.52 (3.85)    |  |
|                    | Cost    | 195.88 (218.37)                           | 215.09 (146.36) | 1203.87 (169.5) | 250.44 (244.36) | 250.44 (244.36) | 1169.6 (234.66)                     | 1220.65 (34.73) | 1251.44 (99.75) | 292.53 (133.89) | 292.53 (133.89) | 215.98 (160.41)                           | 265.33 (102.57) | 265.23 (108.44) | 273.56 (271.34) |  |
| Pennsylvania (PA)  | QALY    | 97.69 (10.12)                             | 98.7 (8.96)     | 103.99 (1.55)   | 103.65 (4.96)   | 103.65 (4.96)   | 73.16 (4.1)                         | 75.71 (3.52)    | 76.98 (2.51)    | 78.02 (7.78)    | 78.02 (7.78)    | 35.17 (1.14)                              | 36.66 (1.06)    | 36.54 (2.34)    | 37.83 (1.12)    |  |
|                    | Cost    | 67.11 (32.08)                             | 44.82 (44.98)   | 27.54 (20.17)   | 20.69 (82.53)   | 20.69 (82.53)   | 21 (5.41)                           | -12.94 (40.24)  | -35.49 (9.62)   | -43.48 (33.62)  | -43.48 (33.62)  | 5.16 (25.03)                              | -35.85 (17.01)  | -64.18 (16.04)  | -74.48 (14.78)  |  |
| Texas (TX)         | QALY    | 2.26 (0.33)                               | 2.3 (0.15)      | 2.42 (0.25)     | 2.4 (0.22)      | 2.4 (0.22)      | 1.4 (0.03)                          | 1.42 (0.09)     | 1.46 (0.07)     | 1.46 (0.22)     | 1.46 (0.22)     | 0.86 (0.09)                               | 0.85 (0.14)     | 0.91 (0.1)      | 0.91 (0.15)     |  |
|                    | Cost    | -28.9 (0.75)                              | -71.71 (1.18)   | -98.34 (0.23)   | -109.68 (2.42)  | -109.68 (2.42)  | -28.99 (1.03)                       | -75.32 (0.37)   | -100.33 (0.86)  | -108.87 (1.01)  | -108.87 (1.01)  | -26.82 (0.24)                             | -73.98 (1.61)   | -95.88 (1.99)   | -108.8 (0.28)   |  |

Notion: moving from scenarios 1 to 3, health conditions across all compartments get better (i.e., the population get healthier).

Observation 1: the QALY saved would be lower in a healthier population (e.g., scenario 3 compared to scenarios 1-2).

Observation 2: we observe mixed results on the impact of scenarios 1-3 on the extra cost: AZ/GA/NY/TX (little to no impact), MD/MA (curvilinear trend), and CA/MI/PA (decreasing trend).

**Table E.2 Robustness check: % of lost income (shaded area represents the results under the baseline scenario) Avg (std dev) of outcomes compared to no-intervention per 100K capita Outcomes: QALY gained (1,000 years) and extra cost (\$ million)**

| State           | Outcome | Scenario 1: proportion of lost income, Eq (EC.5) |                 |                 |                 |                 | Scenario 2: proportion of lost income, Eq (EC.2) |                 |                 |                 |                 | Scenario 3: proportion of lost income, Eq (EC.6) |                 |                 |    |  |  |
|-----------------|---------|--------------------------------------------------|-----------------|-----------------|-----------------|-----------------|--------------------------------------------------|-----------------|-----------------|-----------------|-----------------|--------------------------------------------------|-----------------|-----------------|----|--|--|
|                 |         | Policies                                         |                 |                 |                 |                 | Policies                                         |                 |                 |                 |                 | Policies                                         |                 |                 |    |  |  |
|                 |         | Current                                          | P1              | P2              | P3              |                 | Current                                          | P1              | P2              | P3              |                 | Current                                          | P1              | P2              | P3 |  |  |
| Arizona (AZ)    | QALY    | 0.59 (0.04)                                      | 1.32 (0.09)     | 1.41 (0.02)     | 1.48 (0.05)     | 0.6 (0.04)      | 1.29 (0.04)                                      | 1.41 (0.03)     | 1.44 (0.08)     | 1.44 (0.08)     | 0.53 (0.02)     | 1.2 (0.03)                                       | 1.25 (0.06)     | 1.29 (0.07)     |    |  |  |
|                 | Cost    | -94.1 (0.95)                                     | -110.94 (0.56)  | -134.65 (1.01)  | -141.23 (1.33)  | -44.52 (1.4)    | -68 (0.52)                                       | -91.39 (0.72)   | -99.11 (1.23)   | -99.11 (1.23)   | -24.24 (1.52)   | -44.5 (0.25)                                     | -63.28 (1.51)   | -74.6 (2.21)    |    |  |  |
| California (CA) | QALY    | 26.87 (3.54)                                     | 25.91 (3.67)    | 27.07 (1.62)    | 26.79 (3.16)    | 26.53 (3.51)    | 26.1 (3.76)                                      | 26.48 (3.59)    | 26.71 (2.95)    | 26.71 (2.95)    | 26.18 (1.18)    | 25.39 (3.37)                                     | 25.95 (2.21)    | 26.13 (3.71)    |    |  |  |
|                 | Cost    | 118 (45)                                         | 123.52 (7.38)   | 101.42 (40.97)  | 100.01 (32.12)  | 192.39 (38.96)  | 197.9 (17.52)                                    | 176.85 (9.9)    | 167.97 (53.27)  | 167.97 (53.27)  | 192.49 (34.28)  | 200.82 (60.09)                                   | 180.59 (45.3)   | 173.6 (53.97)   |    |  |  |
| Georgia (GA)    | QALY    | 32.19 (0.79)                                     | 33.96 (4.39)    | 34.95 (5.14)    | 34.21 (2.21)    | 36.07 (2.78)    | 37.41 (4.21)                                     | 38.29 (1.1)     | 38.89 (2.28)    | 38.89 (2.28)    | 42.95 (4.59)    | 43.75 (1.57)                                     | 46.45 (1.57)    | 46.24 (1.29)    |    |  |  |
|                 | Cost    | -30.54 (6.87)                                    | -87.36 (10.52)  | -111.98 (12.82) | -125.6 (12.83)  | 20.91 (9.11)    | -15.66 (11.25)                                   | -36.03 (15.08)  | -43.86 (2.76)   | -43.86 (2.76)   | 20.2 (16.75)    | -8.36 (8.19)                                     | -32.64 (13.34)  | -41.32 (7.99)   |    |  |  |
| Maryland (MD)   | QALY    | 29.27 (2.18)                                     | 29.81 (1.04)    | 31.18 (3.58)    | 30.86 (3.25)    | 29.48 (0.98)    | 30.21 (0.59)                                     | 30.71 (1.47)    | 31.03 (0.64)    | 31.03 (0.64)    | 28.53 (1.32)    | 28.97 (4.05)                                     | 29.84 (1.15)    | 30.52 (4.24)    |    |  |  |
|                 | Cost    | -93.78 (7.8)                                     | -151.78 (10.06) | -191.68 (9.78)  | -200.36 (2.17)  | -30.33 (12.79)  | -68.63 (19.44)                                   | -97.44 (19.51)  | -110.45 (13.61) | -110.45 (13.61) | -11.38 (11.55)  | -49.37 (2.99)                                    | -85.97 (11.28)  | -98.13 (6.91)   |    |  |  |
| Massachusetts   | QALY    | 98.5 (1.56)                                      | 97.68 (1.32)    | 98.66 (2.02)    | 102.53 (1.89)   | 98.47 (3.68)    | 96.64 (3.56)                                     | 99.17 (2.09)    | 100.97 (4.8)    | 100.97 (4.8)    | 105.2 (4.22)    | 101.72 (5.24)                                    | 105.87 (2.72)   | 107.19 (2.31)   |    |  |  |
|                 | Cost    | -42.8 (16.49)                                    | -58.02 (21.89)  | -95.24 (7.89)   | -106.14 (15.76) | 4.34 (12.21)    | -6.4 (8.99)                                      | -43.59 (17)     | -59.01 (8.52)   | -59.01 (8.52)   | 54.99 (20.99)   | 49.19 (18.84)                                    | 26.37 (20.33)   | 17.82 (24.07)   |    |  |  |
| Michigan (MI)   | QALY    | 106.75 (8.16)                                    | 110 (5.52)      | 115.93 (3.3)    | 119.09 (4.39)   | 97.15 (4.41)    | 102 (5.2)                                        | 105.44 (5.71)   | 108.23 (9.59)   | 108.23 (9.59)   | 101.53 (6.25)   | 104.55 (6.28)                                    | 107.42 (7.62)   | 107.99 (5.6)    |    |  |  |
|                 | Cost    | 250.41 (23.55)                                   | 247.55 (68.53)  | 230.54 (61.59)  | 227.46 (120.83) | 344.57 (48.72)  | 349.17 (54.16)                                   | 337.33 (57.16)  | 334.15 (65.37)  | 334.15 (65.37)  | 315.24 (55.42)  | 318.83 (48.66)                                   | 313.3 (40.23)   | 298.66 (27.17)  |    |  |  |
| New York (NY)   | QALY    | 132.3 (1.52)                                     | 136.86 (4.09)   | 145.26 (4.46)   | 145.68 (1.16)   | 132.22 (0.82)   | 138.6 (5.84)                                     | 139.57 (7.46)   | 145.51 (2.42)   | 145.51 (2.42)   | 131.56 (6.95)   | 135.28 (6.93)                                    | 137.96 (7.16)   | 147.24 (1.23)   |    |  |  |
|                 | Cost    | 902.98 (53.03)                                   | 930.4 (217.37)  | 926.4 (122.22)  | 920.43 (231.7)  | 1169.6 (234.66) | 1220.65 (34.73)                                  | 1251.44 (99.75) | 292.53 (133.89) | 292.53 (133.89) | 1312.29 (153.8) | 389.78 (190.89)                                  | 364.77 (179.86) | 346.87 (320.59) |    |  |  |
| Pennsylvania    | QALY    | 70.16 (3.85)                                     | 73.51 (1.46)    | 73.77 (1.99)    | 75.27 (5.58)    | 73.16 (4.1)     | 75.71 (3.52)                                     | 76.98 (2.51)    | 78.02 (7.78)    | 78.02 (7.78)    | 69.26 (3.15)    | 71.22 (5.83)                                     | 73.24 (3.05)    | 73.29 (6.32)    |    |  |  |
|                 | Cost    | 49.64 (38.71)                                    | 19.28 (74.91)   | 3.89 (63.8)     | -4.23 (76.62)   | 21 (5.41)       | -12.94 (40.24)                                   | -35.49 (9.62)   | -43.48 (33.62)  | -43.48 (33.62)  | 12.43 (4.05)    | -14.51 (20.33)                                   | -41.7 (18.89)   | -52.79 (20.64)  |    |  |  |
| Texas (TX)      | QALY    | 1.56 (0.07)                                      | 1.58 (0.15)     | 1.65 (0.09)     | 1.65 (0.18)     | 1.4 (0.03)      | 1.42 (0.09)                                      | 1.46 (0.07)     | 1.46 (0.22)     | 1.46 (0.22)     | 1.27 (0.06)     | 1.28 (0.12)                                      | 1.34 (0.2)      | 1.33 (0.09)     |    |  |  |
|                 | Cost    | -62.76 (1.22)                                    | -118.28 (1.25)  | -144.27 (1.47)  | -154.6 (1.69)   | -28.99 (1.03)   | -75.32 (0.37)                                    | -100.33 (0.86)  | -108.87 (1.01)  | -108.87 (1.01)  | -8.44 (1.27)    | -47.68 (0.85)                                    | -69.29 (1.47)   | -79.02 (2.34)   |    |  |  |

Notion: moving from scenarios 1 to 3, a higher proportion of population would have lost more than 50% of their income under intervention policies.

Observation 1: we observe mixed results on the impact of scenarios 1-3 on the QALY saved: AZ/CA/PA (little to no impact), MD/NY (curvilinear trend), and GA/MA/MI/TX (decreasing/increasing trend).

Observation 2: the extra cost would be higher when a higher proportion of population would lose income (e.g., scenario 3 compared to scenarios 1-2). Exception: MI (a curvilinear relationship) and PA (decrea

**Table E.3 Robustness check: projected infections (shaded area represents the results under the baseline scenario)  
Avg (std dev) of outcomes compared to no-intervention per 100K capita  
Outcomes: QALY gained (1,000 years) and extra cost (\$ million)**

| State              | Outcome | Scenario 2: projected infections (fraction of total population = 10nario 3: projected infections (fraction of total population = 50 |                 |                 |                 |                |                |                                                                                                                                     |                |               |                |                |                |
|--------------------|---------|-------------------------------------------------------------------------------------------------------------------------------------|-----------------|-----------------|-----------------|----------------|----------------|-------------------------------------------------------------------------------------------------------------------------------------|----------------|---------------|----------------|----------------|----------------|
|                    |         | Scenario 1: projected infections (our estimation)                                                                                   |                 |                 |                 |                |                | Scenario 2: projected infections (fraction of total population = 10nario 3: projected infections (fraction of total population = 50 |                |               |                |                |                |
|                    |         | Policies                                                                                                                            |                 |                 | Policies        |                |                | Policies                                                                                                                            |                |               | Policies       |                |                |
|                    |         | Current                                                                                                                             | P1              | P2              | P3              | Current        | P1             | P2                                                                                                                                  | P3             | Current       | P1             | P2             | P3             |
| Arizona (AZ)       | QALY    | 0.6 (0.04)                                                                                                                          | 1.29 (0.04)     | 1.41 (0.03)     | 1.44 (0.08)     | 2.95 (0.03)    | 8.45 (0.56)    | 8.97 (0.94)                                                                                                                         | 9.1 (0.3)      | -3.09 (0.82)  | 25.04 (0.22)   | 30.35 (1.45)   | 34.66 (0.68)   |
|                    | Cost    | -44.52 (1.4)                                                                                                                        | -68 (0.52)      | -91.39 (0.72)   | -99.11 (1.23)   | -50.39 (1.37)  | -74.15 (1.68)  | -96.31 (1.88)                                                                                                                       | -106.96 (0.37) | -50.16 (0.3)  | -71.77 (0.46)  | -95.02 (0.79)  | -104.42 (0.37) |
| California (CA)    | QALY    | 26.53 (3.51)                                                                                                                        | 26.1 (3.76)     | 26.48 (3.59)    | 26.71 (2.95)    | 103.81 (1.08)  | 91.55 (2.82)   | 101.04 (1.5)                                                                                                                        | 113.08 (5.5)   | 98.8 (2.21)   | 85.13 (2.24)   | 96.24 (3.21)   | 111.2 (4.79)   |
|                    | Cost    | 192.39 (38.96)                                                                                                                      | 197.9 (17.52)   | 176.85 (9.9)    | 167.97 (53.27)  | -24.37 (15.78) | -21.48 (13.38) | -43.72 (11.33)                                                                                                                      | -49.38 (15.81) | -37.42 (7.33) | -35.48 (9.04)  | -59.05 (5.12)  | -64.72 (4.69)  |
| Georgia (GA)       | QALY    | 36.07 (2.78)                                                                                                                        | 37.41 (4.21)    | 38.29 (1.1)     | 38.89 (2.28)    | 27.84 (2.2)    | 28.7 (1.32)    | 28.17 (2.18)                                                                                                                        | 28.33 (1.97)   | 23.39 (0.61)  | 17.13 (1.31)   | 21.72 (0.94)   | 27.86 (0.42)   |
|                    | Cost    | 20.91 (9.11)                                                                                                                        | -15.66 (11.25)  | -36.03 (15.08)  | -43.86 (2.76)   | -28.31 (1.47)  | -76.78 (1.02)  | -101.72 (0.8)                                                                                                                       | -112.72 (0.59) | -22.69 (1.36) | -77.27 (0.66)  | -99.35 (2.07)  | -110.01 (1.6)  |
| Maryland (MD)      | QALY    | 29.48 (0.98)                                                                                                                        | 30.21 (0.59)    | 30.71 (1.47)    | 31.03 (0.64)    | 69.58 (0.8)    | 72.61 (2.45)   | 77.81 (0.58)                                                                                                                        | 83.3 (4.93)    | 23.09 (1.1)   | 25.65 (0.92)   | 26.35 (1.48)   | 25.88 (1.37)   |
|                    | Cost    | -30.33 (12.79)                                                                                                                      | -68.63 (19.44)  | -97.44 (19.51)  | -110.45 (13.61) | -38.11 (4.97)  | -81.84 (1.54)  | -112.99 (1.69)                                                                                                                      | -127 (4.56)    | -62.24 (0.51) | -114.76 (0.86) | -151.29 (0.59) | -164.37 (1)    |
| Massachusetts (MA) | QALY    | 98.47 (3.68)                                                                                                                        | 96.64 (3.56)    | 99.17 (2.09)    | 100.97 (4.8)    | 102.96 (1.69)  | 100.32 (3.11)  | 103.01 (2.27)                                                                                                                       | 107.71 (2.78)  | 97.79 (5.33)  | 99.21 (0.76)   | 102.5 (4.86)   | 104.03 (3.45)  |
|                    | Cost    | 4.34 (12.21)                                                                                                                        | -6.4 (8.99)     | -43.59 (17)     | -59.01 (8.52)   | 27.17 (9.61)   | 20.34 (8.75)   | -4.92 (11.02)                                                                                                                       | -19.32 (12.32) | 20.77 (20.17) | 13.69 (10.48)  | -15.02 (15.39) | -32.58 (3.65)  |
| Michigan (MI)      | QALY    | 97.15 (4.41)                                                                                                                        | 102 (5.2)       | 105.44 (5.71)   | 108.23 (9.59)   | 74.68 (3.23)   | 77.52 (2.59)   | 77.49 (4.61)                                                                                                                        | 81.59 (6.08)   | 71.84 (1.45)  | 74.72 (4.18)   | 74.71 (1.15)   | 76.04 (3.12)   |
|                    | Cost    | 344.57 (48.72)                                                                                                                      | 349.17 (54.16)  | 337.33 (57.16)  | 334.15 (65.37)  | -51.69 (1.55)  | -73.78 (0.31)  | -99.2 (1.96)                                                                                                                        | -106.59 (0.77) | -53.28 (1.46) | -75.15 (1.03)  | -98.12 (2.24)  | -109.22 (2.47) |
| New York (NY)      | QALY    | 132.22 (0.82)                                                                                                                       | 138.6 (5.84)    | 139.57 (7.46)   | 145.51 (2.42)   | 63.14 (1.88)   | 63.3 (5.41)    | 65.02 (5.93)                                                                                                                        | 64.42 (2.64)   | 59.46 (5.09)  | 59.65 (5.11)   | 61.86 (2.86)   | 60.24 (6.26)   |
|                    | Cost    | 1169.6 (234.66)                                                                                                                     | 1220.65 (34.73) | 1251.44 (99.75) | 292.53 (133.89) | 32.8 (14.71)   | 21.57 (25.18)  | 3.23 (25.96)                                                                                                                        | -7.07 (14.27)  | 25.45 (19.42) | 15.38 (6.04)   | -5.13 (24.82)  | -17.51 (24.91) |
| Pennsylvania (PA)  | QALY    | 73.16 (4.1)                                                                                                                         | 75.71 (3.52)    | 76.98 (2.51)    | 78.02 (7.78)    | 53.41 (3.35)   | 53.66 (4.51)   | 54.27 (3.33)                                                                                                                        | 55.05 (2.23)   | 29.42 (0.48)  | 32.79 (0.66)   | 33.02 (0.4)    | 32.77 (2.24)   |
|                    | Cost    | 21 (5.41)                                                                                                                           | -12.94 (40.24)  | -35.49 (9.62)   | -43.48 (33.62)  | -41.79 (1.87)  | -87.33 (1.3)   | -111.8 (1.07)                                                                                                                       | -124.78 (2.35) | -40.67 (0.76) | -88.79 (1.58)  | -116.9 (2)     | -127.61 (2.52) |
| Texas (TX)         | QALY    | 1.4 (0.03)                                                                                                                          | 1.42 (0.09)     | 1.46 (0.07)     | 1.46 (0.22)     | 12.72 (1.05)   | 13.25 (0.89)   | 13.19 (0.92)                                                                                                                        | 13.46 (1.08)   | 10.47 (1.03)  | 11.13 (0.42)   | 11.65 (0.32)   | 11.9 (1.34)    |
|                    | Cost    | -28.99 (1.03)                                                                                                                       | -75.32 (0.37)   | -100.33 (0.86)  | -108.87 (1.01)  | -25.91 (0.78)  | -71.78 (0.49)  | -93.83 (0.6)                                                                                                                        | -104.29 (2.34) | -26.99 (1.45) | -77.14 (1.57)  | -100.53 (2.06) | -109.16 (0.3)  |

Notion: moving from scenarios 1 to 3, the number of projected infections would increase.

Observation 1: we observe mixed results on the impact of scenarios 1-3 on the QALY saved: MA (little to no impact), MD (curvilinear trend), GA/MI/PA (decreasing trend), and AZ/CA/TX (increasing trend).  
Observation 2: the extra cost would be lower when the number of projected infections increases (e.g., scenario 3 compared to scenarios 1-2). Exception: AZ/TX (little to no impact) and MA (increasing trend).

**Table E.4 Robustness check: risk perception (shaded area represents the results under the baseline scenario)**  
**Avg (std dev) of outcomes compared to no-intervention per 100K capita**  
**Outcomes: QALY gained (1,000 years) and extra cost (\$ million)**

| State              | Outcome | Scenario 1: risk perception about the negative outcomes of the pandemic ( $\alpha = 0.0$ ) |                 |                  |                  |                 | Scenario 2: risk perception about the negative outcomes of the pandemic ( $\alpha = -0.1$ ) |                 |                  |                  |                 | Scenario 3: risk perception about the negative outcomes of the pandemic ( $\alpha = -0.2$ ) |                 |                 |                 |                | Scenario 4: risk perception about the negative outcomes of the pandemic ( $\alpha = -0.5$ ) |                |                |                 |                 |
|--------------------|---------|--------------------------------------------------------------------------------------------|-----------------|------------------|------------------|-----------------|---------------------------------------------------------------------------------------------|-----------------|------------------|------------------|-----------------|---------------------------------------------------------------------------------------------|-----------------|-----------------|-----------------|----------------|---------------------------------------------------------------------------------------------|----------------|----------------|-----------------|-----------------|
|                    |         | Policies                                                                                   |                 |                  |                  |                 | Policies                                                                                    |                 |                  |                  |                 | Policies                                                                                    |                 |                 |                 |                | Policies                                                                                    |                |                |                 |                 |
|                    |         | Current                                                                                    | P1              | P2               | P3               | P4              | Current                                                                                     | P1              | P2               | P3               | P4              | Current                                                                                     | P1              | P2              | P3              | P4             | Current                                                                                     | P1             | P2             | P3              | P4              |
| Arizona (AZ)       | QALY    | 0.63 (0.03)                                                                                | 1.35 (0.04)     | 1.48 (0.09)      | 1.55 (0.12)      | 0.6 (0.04)      | 1.29 (0.04)                                                                                 | 1.41 (0.03)     | 1.44 (0.08)      | 1.44 (0.08)      | 0.63 (0.01)     | 1.33 (0.02)                                                                                 | 1.48 (0.09)     | 1.49 (0.1)      | 1.49 (0.1)      | 0.56 (0.02)    | 1.28 (0.07)                                                                                 | 1.34 (0.02)    | 1.34 (0.02)    | 1.4 (0.07)      | 1.4 (0.07)      |
|                    | Cost    | -46.45 (1.11)                                                                              | -68.11 (1.52)   | -94.05 (0.26)    | -100.62 (0.91)   | -44.52 (1.4)    | -68 (0.52)                                                                                  | -91.39 (0.72)   | -99.11 (1.23)    | -99.11 (1.23)    | -49.02 (1.6)    | -72.02 (0.92)                                                                               | -95.68 (1.16)   | -103.78 (2.26)  | -103.78 (2.26)  | -50.99 (0.99)  | -71.33 (1.65)                                                                               | -92.71 (0.63)  | -92.71 (0.63)  | -98.58 (0.47)   | -98.58 (0.47)   |
| California (CA)    | QALY    | 32.77 (1.41)                                                                               | 32.07 (2.16)    | 32.97 (1.73)     | 32.62 (4.1)      | 26.53 (3.51)    | 26.1 (3.76)                                                                                 | 26.48 (3.59)    | 26.71 (2.95)     | 26.71 (2.95)     | 33.83 (4.32)    | 34.19 (4.11)                                                                                | 34.79 (0.99)    | 33.96 (5.09)    | 33.96 (5.09)    | 24.77 (3.01)   | 24.03 (3.05)                                                                                | 24.39 (1.88)   | 24.39 (1.88)   | 25.23 (2.58)    | 25.23 (2.58)    |
|                    | Cost    | 189.93 (35.2)                                                                              | 200.2 (35.71)   | 180.63 (49.8)    | 170.54 (52.53)   | 192.39 (38.96)  | 197.9 (17.52)                                                                               | 176.85 (9.9)    | 167.97 (53.27)   | 167.97 (53.27)   | 241.82 (15.06)  | 246.07 (67.81)                                                                              | 222.58 (80.79)  | 223.44 (90.05)  | 223.44 (90.05)  | 122.73 (9.89)  | 121.35 (14.88)                                                                              | 106.29 (31.88) | 106.29 (31.88) | 100.71 (12.89)  | 100.71 (12.89)  |
| Georgia (GA)       | QALY    | 30.57 (4.99)                                                                               | 32.27 (3.07)    | 33.1 (1.87)      | 32.52 (3.75)     | 36.07 (2.78)    | 37.41 (4.21)                                                                                | 38.29 (1.1)     | 38.89 (2.28)     | 38.89 (2.28)     | 30.34 (0.73)    | 31.42 (3.05)                                                                                | 32.73 (2.76)    | 32.24 (3.27)    | 32.24 (3.27)    | 22.74 (2.39)   | 23.44 (0.36)                                                                                | 24.08 (0.35)   | 24.08 (0.35)   | 24.65 (0.81)    | 24.65 (0.81)    |
|                    | Cost    | 0.13 (2.84)                                                                                | -48.89 (4.78)   | -69.83 (15.24)   | -80.8 (4.5)      | 20.91 (9.11)    | -15.66 (11.25)                                                                              | -36.03 (15.08)  | -43.86 (2.76)    | -43.86 (2.76)    | 0.22 (9.12)     | -47.97 (10.35)                                                                              | -69.71 (5.41)   | -81.34 (5.55)   | -81.34 (5.55)   | 3.87 (9.13)    | -38.75 (5.66)                                                                               | -63.15 (4.23)  | -63.15 (4.23)  | -73.82 (6.46)   | -73.82 (6.46)   |
| Maryland (MD)      | QALY    | 30.86 (3.77)                                                                               | 32.06 (2.23)    | 31.92 (2.2)      | 32.04 (1.49)     | 29.48 (0.98)    | 30.21 (0.59)                                                                                | 30.71 (1.47)    | 31.03 (0.64)     | 31.03 (0.64)     | 18.96 (3.05)    | 19.47 (3.26)                                                                                | 20.22 (0.35)    | 20.42 (1.25)    | 20.42 (1.25)    | 16.47 (0.41)   | 16.86 (1.23)                                                                                | 17.63 (1.36)   | 17.63 (1.36)   | 17.83 (0.53)    | 17.83 (0.53)    |
|                    | Cost    | -34.94 (8.47)                                                                              | -81.46 (10.26)  | -121.5 (11.44)   | -138.61 (4.15)   | -30.33 (12.79)  | -68.63 (19.44)                                                                              | -97.44 (19.51)  | -110.45 (13.61)  | -110.45 (13.61)  | -35.66 (10.13)  | -78.11 (15.29)                                                                              | -112.55 (24.75) | -126.17 (9.68)  | -126.17 (9.68)  | -16.69 (10.16) | -62.04 (14.26)                                                                              | -94.52 (21.65) | -94.52 (21.65) | -106.37 (22.73) | -106.37 (22.73) |
| Massachusetts (MA) | QALY    | 112.37 (2.85)                                                                              | 110.85 (0.79)   | 116.57 (6.06)    | 117.12 (3.07)    | 98.47 (3.68)    | 96.64 (3.56)                                                                                | 99.17 (2.09)    | 100.97 (4.8)     | 100.97 (4.8)     | 78.9 (2.69)     | 79.21 (0.92)                                                                                | 82.02 (1.16)    | 84.67 (3.76)    | 84.67 (3.76)    | 19.17 (0.96)   | 19.11 (1.84)                                                                                | 20.76 (1.78)   | 20.76 (1.78)   | 22.74 (0.91)    | 22.74 (0.91)    |
|                    | Cost    | 42.22 (18.5)                                                                               | 32.65 (26.22)   | 10.24 (7.7)      | -0.4 (22.36)     | 4.34 (12.21)    | -6.4 (8.99)                                                                                 | -43.59 (17)     | -59.01 (8.52)    | -59.01 (8.52)    | -26.26 (8.8)    | -36.93 (10.29)                                                                              | -73.56 (2.58)   | -88.72 (8.28)   | -88.72 (8.28)   | -98.51 (2.92)  | -108.61 (2.6)                                                                               | -144.73 (1.33) | -144.73 (1.33) | -161.14 (2.95)  | -161.14 (2.95)  |
| Michigan (MI)      | QALY    | 106.79 (5.27)                                                                              | 113.36 (8.24)   | 117.63 (6.61)    | 120.54 (7.81)    | 97.15 (4.41)    | 102 (5.2)                                                                                   | 105.44 (5.71)   | 108.23 (9.39)    | 108.23 (9.39)    | 90.99 (4.52)    | 94.03 (4.47)                                                                                | 97.51 (6.48)    | 101.93 (4.6)    | 101.93 (4.6)    | 47.06 (2.07)   | 50.57 (1.89)                                                                                | 55.16 (3.34)   | 55.16 (3.34)   | 56.82 (5.03)    | 56.82 (5.03)    |
|                    | Cost    | 350.81 (57.49)                                                                             | 352.73 (152.51) | 331.79 (63.22)   | 330.58 (76.67)   | 344.57 (48.72)  | 349.17 (54.16)                                                                              | 337.33 (57.16)  | 334.15 (65.37)   | 334.15 (65.37)   | 197.47 (95.58)  | 196.9 (51.42)                                                                               | 181.43 (48.97)  | 185.54 (41.52)  | 185.54 (41.52)  | 111.67 (51.09) | 106.25 (36.44)                                                                              | 94.23 (25.51)  | 94.23 (25.51)  | 92.51 (30.54)   | 92.51 (30.54)   |
| New York (NY)      | QALY    | 145.48 (7.19)                                                                              | 147.62 (6.95)   | 154.27 (4.44)    | 163.02 (3.93)    | 132.22 (0.82)   | 138.6 (5.84)                                                                                | 139.57 (7.46)   | 145.51 (2.42)    | 145.51 (2.42)    | 131.07 (3.12)   | 136.78 (2.27)                                                                               | 138.08 (3.66)   | 142.98 (6.83)   | 142.98 (6.83)   | 83.33 (6.35)   | 90.65 (5.41)                                                                                | 95.68 (3.06)   | 95.68 (3.06)   | 98.76 (4.36)    | 98.76 (4.36)    |
|                    | Cost    | 1199.56 (271.86)                                                                           | 1263 (117.6)    | 1257.52 (249.31) | 1298.61 (298.09) | 1169.6 (234.66) | 1220.65 (34.73)                                                                             | 1251.44 (99.75) | 1292.53 (133.89) | 1292.53 (133.89) | 778.84 (112.02) | 793.38 (137.35)                                                                             | 819.32 (127.9)  | 800.46 (248.06) | 800.46 (248.06) | 596.34 (36.84) | 620.64 (57.23)                                                                              | 645.18 (38.12) | 645.18 (38.12) | 636.6 (133.19)  | 636.6 (133.19)  |
| Pennsylvania (PA)  | QALY    | 65.99 (3.77)                                                                               | 68.48 (4.23)    | 69.41 (5.2)      | 69.56 (6.08)     | 73.16 (4.1)     | 75.71 (3.52)                                                                                | 76.98 (2.51)    | 78.02 (7.78)     | 78.02 (7.78)     | 70.49 (1.79)    | 73.97 (0.77)                                                                                | 76.54 (5.96)    | 75.14 (6.47)    | 75.14 (6.47)    | 40.82 (2.68)   | 44.22 (3.69)                                                                                | 45.81 (3.5)    | 45.81 (3.5)    | 46.88 (0.64)    | 46.88 (0.64)    |
|                    | Cost    | -25.78 (6.31)                                                                              | -70.95 (9.36)   | -99.53 (2.27)    | -111.18 (9.76)   | 21 (5.41)       | -12.94 (40.24)                                                                              | -35.49 (9.62)   | -43.48 (33.62)   | -43.48 (33.62)   | 27.87 (37.43)   | 1.44 (1.343)                                                                                | -24.5 (14.01)   | -36.03 (22.9)   | -36.03 (22.9)   | -18.22 (13.17) | -61.11 (12.08)                                                                              | -90.28 (9.78)  | -90.28 (9.78)  | -100.51 (14.35) | -100.51 (14.35) |
| Texas (TX)         | QALY    | 1.69 (0.08)                                                                                | 1.67 (0.19)     | 1.74 (0.24)      | 1.76 (0.19)      | 1.4 (0.03)      | 1.42 (0.09)                                                                                 | 1.46 (0.07)     | 1.46 (0.22)      | 1.46 (0.22)      | 1.65 (0.11)     | 1.66 (0.04)                                                                                 | 1.69 (0.14)     | 1.69 (0.09)     | 1.69 (0.09)     | 1.27 (0.12)    | 1.31 (0.1)                                                                                  | 1.32 (0.02)    | 1.32 (0.02)    | 1.35 (0.1)      | 1.35 (0.1)      |
|                    | Cost    | -26.5 (0.8)                                                                                | -70.37 (1.58)   | -93.01 (0.34)    | -103.2 (2.44)    | -28.99 (1.03)   | -75.32 (0.37)                                                                               | -100.33 (0.86)  | -108.87 (1.01)   | -108.87 (1.01)   | -27.36 (0.24)   | -70.09 (1.29)                                                                               | -94.69 (0.82)   | -105.67 (0.3)   | -105.67 (0.3)   | -29.02 (1.6)   | -73.91 (1.47)                                                                               | -98.15 (1.83)  | -98.15 (1.83)  | -107.33 (1.15)  | -107.33 (1.15)  |

Notion: moving from scenarios 1 to 4, people's level of risk perception about the negative outcomes of the pandemic would increase.

Observation 1: the QALY saved would be lower when the risk perception increases (e.g., scenario 4 compared to scenarios 1-3).

Observation 2: we observe mixed results on the impact of scenarios 1-4 on the extra cost: AZ/TX (little to no impact), CA/GA/PA (curvilinear trend), MA/MI/NY (decreasing trend), and MD (increasing trend).

**Table E.5 Robustness check: % of lost income when not going out under no-intervention (shaded area represents the results under the baseline scenario)**  
**Avg (std dev) of outcomes compared to no-intervention per 100K capita**  
**Outcomes: QALY gained (1,000 years) and extra cost (\$ million)**

| State              | Outcome | Scenario: % people losing income when not going out under no intervention ( $\xi = 0.25$ ) |                 |                 |                 |                 |                 | Scenario: % people losing income when not going out under no intervention ( $\xi = 0.50$ ) |                 |                 |                 |                 |                 | Scenario: % people losing income when not going out under no intervention ( $\xi = 0.75$ ) |                 |                 |                 |                 |                 |                 |                 |
|--------------------|---------|--------------------------------------------------------------------------------------------|-----------------|-----------------|-----------------|-----------------|-----------------|--------------------------------------------------------------------------------------------|-----------------|-----------------|-----------------|-----------------|-----------------|--------------------------------------------------------------------------------------------|-----------------|-----------------|-----------------|-----------------|-----------------|-----------------|-----------------|
|                    |         | Policies                                                                                   |                 |                 | Policies        |                 |                 | Policies                                                                                   |                 |                 | Policies        |                 |                 | Policies                                                                                   |                 |                 | Policies        |                 |                 |                 |                 |
|                    |         | Current                                                                                    | P1              | P2              | P3              | Current         | P1              | P2                                                                                         | P3              | Current         | P1              | P2              | P3              | Current                                                                                    | P1              | P2              | P3              | Current         | P1              | P2              | P3              |
| Arizona (AZ)       | QALY    | 0.55 (0.01)                                                                                | 1.25 (0.06)     | 1.36 (0.08)     | 1.41 (0.05)     | 0.6 (0.04)      | 1.29 (0.04)     | 1.41 (0.03)                                                                                | 1.44 (0.08)     | 0.6 (0.03)      | 1.31 (0.04)     | 1.42 (0.04)     | 1.47 (0.09)     | 0.6 (0.03)                                                                                 | 1.31 (0.04)     | 1.42 (0.04)     | 1.47 (0.09)     | 0.6 (0.03)      | 1.31 (0.04)     | 1.42 (0.04)     | 1.47 (0.09)     |
|                    | Cost    | -110 (1.15)                                                                                | -127.58 (0.43)  | -153 (1.59)     | -159.62 (2.38)  | -44.52 (1.4)    | -68 (0.52)      | -91.39 (0.72)                                                                              | -99.11 (1.23)   | -44.52 (1.4)    | -68 (0.52)      | -91.39 (0.72)   | -99.11 (1.23)   | 7.05 (1.29)                                                                                | -9.49 (0.44)    | -31.95 (0.6)    | -41.74 (0.81)   | 7.05 (1.29)     | -9.49 (0.44)    | -31.95 (0.6)    | -41.74 (0.81)   |
| California (CA)    | QALY    | 33.12 (4.71)                                                                               | 32.18 (2.78)    | 32.59 (2.49)    | 33.99 (2.81)    | 26.53 (3.51)    | 26.1 (3.76)     | 26.48 (3.59)                                                                               | 26.71 (2.95)    | 30.91 (4.87)    | 30.41 (1.5)     | 31.13 (3.26)    | 31.19 (0.78)    | 30.91 (4.87)                                                                               | 30.41 (1.5)     | 31.13 (3.26)    | 31.19 (0.78)    | 30.91 (4.87)    | 30.41 (1.5)     | 31.13 (3.26)    | 31.19 (0.78)    |
|                    | Cost    | 174.03 (17.87)                                                                             | 183.66 (55.07)  | 165.11 (85.85)  | 157.77 (18.99)  | 192.39 (38.96)  | 197.9 (17.52)   | 176.85 (9.9)                                                                               | 167.97 (53.27)  | 230.16 (35.92)  | 231.79 (28.28)  | 214.86 (38.52)  | 211.89 (24.19)  | 230.16 (35.92)                                                                             | 231.79 (28.28)  | 214.86 (38.52)  | 211.89 (24.19)  | 230.16 (35.92)  | 231.79 (28.28)  | 214.86 (38.52)  | 211.89 (24.19)  |
| Georgia (GA)       | QALY    | 32.53 (0.91)                                                                               | 34.02 (2.74)    | 34.7 (3.39)     | 35.34 (1.32)    | 36.07 (2.78)    | 37.41 (4.21)    | 38.29 (1.1)                                                                                | 38.89 (2.28)    | 38.91 (4.22)    | 39.97 (4.57)    | 41.12 (1.07)    | 41.79 (5.66)    | 38.91 (4.22)                                                                               | 39.97 (4.57)    | 41.12 (1.07)    | 41.79 (5.66)    | 38.91 (4.22)    | 39.97 (4.57)    | 41.12 (1.07)    | 41.79 (5.66)    |
|                    | Cost    | -37.1 (12.72)                                                                              | -81.05 (27.25)  | -102.78 (15.83) | -110.25 (18.2)  | 20.91 (9.11)    | -15.66 (11.25)  | -36.03 (15.08)                                                                             | -43.86 (2.76)   | 20.91 (9.11)    | -15.66 (11.25)  | -36.03 (15.08)  | -43.86 (2.76)   | 50.83 (7.15)                                                                               | 21.83 (16.3)    | 6.2 (7.35)      | -1 (13.91)      | 50.83 (7.15)    | 21.83 (16.3)    | 6.2 (7.35)      | -1 (13.91)      |
| Maryland (MD)      | QALY    | 26.35 (1.25)                                                                               | 27.6 (3.67)     | 28.05 (2.24)    | 27.81 (1.03)    | 29.48 (0.98)    | 30.21 (0.59)    | 30.71 (1.47)                                                                               | 31.03 (0.64)    | 23.19 (2.77)    | 24.22 (2.7)     | 24.72 (2.06)    | 24.21 (2.15)    | 23.19 (2.77)                                                                               | 24.22 (2.7)     | 24.72 (2.06)    | 24.21 (2.15)    | 23.19 (2.77)    | 24.22 (2.7)     | 24.72 (2.06)    | 24.21 (2.15)    |
|                    | Cost    | -113.43 (32.1)                                                                             | -162.21 (9.28)  | -197.08 (15.01) | -209.72 (21.84) | -30.33 (12.79)  | -68.63 (19.44)  | -97.44 (19.51)                                                                             | -110.45 (13.61) | -30.33 (12.79)  | -68.63 (19.44)  | -97.44 (19.51)  | -110.45 (13.61) | 37.89 (11.45)                                                                              | 8.21 (8.96)     | -22.07 (19.78)  | -35.43 (4.25)   | 37.89 (11.45)   | 8.21 (8.96)     | -22.07 (19.78)  | -35.43 (4.25)   |
| Massachusetts (MA) | QALY    | 106.27 (5.37)                                                                              | 104.92 (3.09)   | 106.47 (1.81)   | 110.9 (2.89)    | 98.47 (3.68)    | 96.64 (3.56)    | 99.17 (2.09)                                                                               | 100.97 (4.8)    | 99.26 (0.81)    | 96.38 (3.02)    | 101.59 (1.28)   | 103.57 (4.83)   | 99.26 (0.81)                                                                               | 96.38 (3.02)    | 101.59 (1.28)   | 103.57 (4.83)   | 99.26 (0.81)    | 96.38 (3.02)    | 101.59 (1.28)   | 103.57 (4.83)   |
|                    | Cost    | -14.76 (13.8)                                                                              | -24.89 (5.53)   | -65.29 (7.68)   | -81.07 (19.97)  | 4.34 (12.21)    | -6.4 (8.99)     | -43.59 (17)                                                                                | -59.01 (8.52)   | 4.34 (12.21)    | -6.4 (8.99)     | -43.59 (17)     | -59.01 (8.52)   | 85.24 (3.57)                                                                               | 76.63 (12.11)   | 52.24 (20.9)    | 45.9 (4.69)     | 85.24 (3.57)    | 76.63 (12.11)   | 52.24 (20.9)    | 45.9 (4.69)     |
| Michigan (MI)      | QALY    | 107.39 (4.98)                                                                              | 113.99 (5.48)   | 114.86 (6.17)   | 116.87 (3.14)   | 97.15 (4.41)    | 102 (5.2)       | 105.44 (5.71)                                                                              | 108.23 (9.59)   | 106.61 (7.06)   | 112.08 (5.13)   | 112.3 (1.7)     | 116.31 (2.69)   | 106.61 (7.06)                                                                              | 112.08 (5.13)   | 112.3 (1.7)     | 116.31 (2.69)   | 106.61 (7.06)   | 112.08 (5.13)   | 112.3 (1.7)     | 116.31 (2.69)   |
|                    | Cost    | 79.02 (31.62)                                                                              | 67.95 (52.09)   | 55.89 (37.05)   | 49.39 (28.32)   | 344.57 (48.72)  | 349.17 (54.16)  | 337.33 (57.16)                                                                             | 334.15 (65.37)  | 344.57 (48.72)  | 349.17 (54.16)  | 337.33 (57.16)  | 334.15 (65.37)  | 272.12 (62.64)                                                                             | 278.93 (76.51)  | 259.93 (98.95)  | 260.71 (53.99)  | 272.12 (62.64)  | 278.93 (76.51)  | 259.93 (98.95)  | 260.71 (53.99)  |
| New York (NY)      | QALY    | 149.81 (0.95)                                                                              | 150.53 (5.62)   | 156.97 (6.01)   | 161.34 (5.44)   | 132.22 (0.82)   | 138.6 (5.84)    | 139.57 (7.46)                                                                              | 145.51 (2.42)   | 137.91 (2.58)   | 146.48 (5.25)   | 148.11 (5.64)   | 153.2 (1.38)    | 137.91 (2.58)                                                                              | 146.48 (5.25)   | 148.11 (5.64)   | 153.2 (1.38)    | 137.91 (2.58)   | 146.48 (5.25)   | 148.11 (5.64)   | 153.2 (1.38)    |
|                    | Cost    | 1155.27 (57.96)                                                                            | 1254.01 (44.35) | 191.55 (270.35) | 201.42 (136.05) | 1169.6 (234.66) | 1220.65 (34.73) | 1251.44 (99.75)                                                                            | 292.53 (133.89) | 1112.75 (64.25) | 188.14 (271.07) | 130.27 (287.65) | 159.58 (216.85) | 1112.75 (64.25)                                                                            | 188.14 (271.07) | 130.27 (287.65) | 159.58 (216.85) | 1112.75 (64.25) | 188.14 (271.07) | 130.27 (287.65) | 159.58 (216.85) |
| Pennsylvania (PA)  | QALY    | 69.5 (2.35)                                                                                | 72.87 (2.92)    | 73.44 (1.2)     | 75.1 (6.21)     | 73.16 (4.1)     | 75.71 (3.52)    | 76.98 (2.51)                                                                               | 78.02 (7.78)    | 72.8 (3.62)     | 75.79 (3.71)    | 76 (1.18)       | 77.76 (3.95)    | 72.8 (3.62)                                                                                | 75.79 (3.71)    | 76 (1.18)       | 77.76 (3.95)    | 72.8 (3.62)     | 75.79 (3.71)    | 76 (1.18)       | 77.76 (3.95)    |
|                    | Cost    | -54.2 (21.65)                                                                              | -98.53 (24.81)  | -123.74 (18.1)  | -140.15 (24.49) | 21 (5.41)       | -12.94 (40.24)  | -35.49 (9.62)                                                                              | -43.48 (33.62)  | 21 (5.41)       | -12.94 (40.24)  | -35.49 (9.62)   | -43.48 (33.62)  | 41.98 (17.06)                                                                              | 14.49 (17.63)   | -4.56 (10.68)   | -17.5 (4.96)    | 41.98 (17.06)   | 14.49 (17.63)   | -4.56 (10.68)   | -17.5 (4.96)    |
| Texas (TX)         | QALY    | 1.61 (0.1)                                                                                 | 1.6 (0.18)      | 1.67 (0.2)      | 1.68 (0.19)     | 1.4 (0.03)      | 1.42 (0.09)     | 1.46 (0.07)                                                                                | 1.46 (0.22)     | 1.28 (0.18)     | 1.31 (0.15)     | 1.35 (0.14)     | 1.33 (0.12)     | 1.28 (0.18)                                                                                | 1.31 (0.15)     | 1.35 (0.14)     | 1.33 (0.12)     | 1.28 (0.18)     | 1.31 (0.15)     | 1.35 (0.14)     | 1.33 (0.12)     |
|                    | Cost    | -89.95 (0.9)                                                                               | -137.24 (0.72)  | -164.56 (0.91)  | -175.28 (1.85)  | -28.99 (1.03)   | -75.32 (0.37)   | -100.33 (0.86)                                                                             | -108.87 (1.01)  | -28.99 (1.03)   | -75.32 (0.37)   | -100.33 (0.86)  | -108.87 (1.01)  | 19.97 (1.62)                                                                               | -13.32 (1.04)   | -36.46 (1.58)   | -46.08 (2.56)   | 19.97 (1.62)    | -13.32 (1.04)   | -36.46 (1.58)   | -46.08 (2.56)   |

Notion: moving from scenarios 1 to 3, a higher percentage of people who would not go out (under no intervention) would lose their income.

Observation 1: there is little to no change in the QALY saved when the proportion of people losing income (when no going out) increases (e.g., scenario 3 compared to scenarios 1-2). Exception: MA/TX (declining trend).

Observation 2: the extra cost would be higher when the proportion of people losing income (when no going out) increases (e.g., scenario 3 compared to scenarios 1-2). Exception: NY (curvilinear trend).

**Table E.6 Robustness check: % quarantine (shaded area represents the results under the baseline scenario) Avg (std dev) of outcomes compared to no-intervention per 100K capita Outcomes: QALY gained (1,000 years) and extra cost (\$ million)**

| State              | Outcome | Scenario: % quarantine among infected people ( $\gamma = 0.25$ ) |                 |                 | Scenario: % quarantine among infected people ( $\gamma = 0.50$ ) |                 |                 | Scenario: % quarantine among infected people ( $\gamma = 0.75$ ) |                 |                 |                 |                |                 |
|--------------------|---------|------------------------------------------------------------------|-----------------|-----------------|------------------------------------------------------------------|-----------------|-----------------|------------------------------------------------------------------|-----------------|-----------------|-----------------|----------------|-----------------|
|                    |         | Current                                                          | P1              | P2              | P3                                                               | Current         | P1              | P2                                                               | P3              | Current         | P1              | P2             | P3              |
| Arizona (AZ)       | QALY    | 0.55 (0.03)                                                      | 1.22 (0.02)     | 1.33 (0.05)     | 1.36 (0.04)                                                      | 0.6 (0.04)      | 1.29 (0.04)     | 1.41 (0.03)                                                      | 1.44 (0.08)     | 0.61 (0.04)     | 1.35 (0.09)     | 1.43 (0.09)    | 1.46 (0.04)     |
|                    | Cost    | -49.72 (1.01)                                                    | -72.06 (1.54)   | -93.42 (1.74)   | -104.93 (1.73)                                                   | -44.52 (1.4)    | -68 (0.52)      | -91.39 (0.72)                                                    | -99.11 (1.23)   | -52.33 (1.55)   | -73.62 (1.33)   | -95.77 (0.74)  | -100.04 (0.47)  |
| California (CA)    | QALY    | 27.74 (4.03)                                                     | 26.89 (1.08)    | 26.99 (3.86)    | 27.03 (3.65)                                                     | 26.53 (3.51)    | 26.1 (3.76)     | 26.48 (3.59)                                                     | 26.71 (2.95)    | 38.95 (1.53)    | 37.36 (3.66)    | 37.95 (5.36)   | 38.41 (0.77)    |
|                    | Cost    | 187.23 (54.81)                                                   | 182.57 (58.99)  | 167.73 (75.32)  | 158.39 (59.65)                                                   | 192.39 (38.96)  | 197.9 (17.52)   | 176.85 (9.9)                                                     | 167.97 (53.27)  | 280.49 (71.33)  | 278.39 (99.26)  | 272.92 (47.06) | 259.65 (77.11)  |
| Georgia (GA)       | QALY    | 36.15 (3.9)                                                      | 37.18 (5.38)    | 37.58 (5.53)    | 38.78 (1.04)                                                     | 36.07 (2.78)    | 37.41 (4.21)    | 38.29 (1.1)                                                      | 38.89 (2.28)    | 39.62 (1.61)    | 42.05 (3.46)    | 42.72 (2.51)   | 42.83 (2.23)    |
|                    | Cost    | 14.62 (8.3)                                                      | -23.46 (20.27)  | -47.98 (7.68)   | -55.51 (14.07)                                                   | 20.91 (9.11)    | -15.66 (11.25)  | -36.03 (15.08)                                                   | -43.86 (2.76)   | 23.31 (21.86)   | -9.62 (3.22)    | -33.79 (19.49) | -45.47 (14.8)   |
| Maryland (MD)      | QALY    | 30.55 (2.92)                                                     | 30.77 (1.76)    | 30.88 (3.69)    | 31.93 (4.32)                                                     | 29.48 (0.98)    | 30.21 (0.59)    | 30.71 (1.47)                                                     | 31.03 (0.64)    | 25.65 (3.15)    | 25.85 (4.14)    | 26.71 (0.92)   | 26.59 (3.6)     |
|                    | Cost    | -21.2 (10.48)                                                    | -64.11 (22.61)  | -100.83 (10.69) | -114.29 (24.6)                                                   | -30.33 (12.79)  | -68.63 (19.44)  | -97.44 (19.51)                                                   | -110.45 (13.61) | -24.71 (4.25)   | -69.44 (3.39)   | -107.66 (7.62) | -117.22 (5.41)  |
| Massachusetts (MA) | QALY    | 107.84 (5.08)                                                    | 106.46 (0.81)   | 109.41 (3.36)   | 110.54 (4.53)                                                    | 98.47 (3.68)    | 96.64 (3.56)    | 99.17 (2.09)                                                     | 100.97 (4.8)    | 98.8 (1.91)     | 98.94 (1.55)    | 102.84 (2.67)  | 105.04 (6.08)   |
|                    | Cost    | 3.93 (8.22)                                                      | -4.47 (11.33)   | -41.48 (17.72)  | -56.11 (8.91)                                                    | 4.34 (12.21)    | -6.4 (8.99)     | -43.59 (17)                                                      | -59.01 (8.52)   | 20.84 (3.27)    | 12.9 (17.2)     | -17 (13.21)    | -33.04 (15.8)   |
| Michigan (MI)      | QALY    | 102.11 (8.51)                                                    | 106.51 (3.83)   | 111.53 (8.88)   | 112.59 (4.95)                                                    | 97.15 (4.41)    | 102 (5.2)       | 105.44 (5.71)                                                    | 108.23 (9.59)   | 90.68 (3.47)    | 95.93 (6.37)    | 98.5 (1.03)    | 103.46 (7.4)    |
|                    | Cost    | 244.67 (18.53)                                                   | 239.64 (49.29)  | 225.04 (113.37) | 218.7 (87.68)                                                    | 344.57 (48.72)  | 349.17 (54.16)  | 337.33 (57.16)                                                   | 334.15 (65.37)  | 200.51 (56.92)  | 198.86 (20.17)  | 185.7 (20.5)   | 182.44 (46.79)  |
| New York (NY)      | QALY    | 140.05 (2.63)                                                    | 144.64 (4.8)    | 146.97 (5.17)   | 153.82 (7.14)                                                    | 132.22 (0.82)   | 138.6 (5.84)    | 139.57 (7.46)                                                    | 145.51 (2.42)   | 135.5 (6.92)    | 137.94 (3.29)   | 142.34 (2.65)  | 146.66 (3.58)   |
|                    | Cost    | 1251.31 (53.84)                                                  | 301.34 (171.58) | 374.58 (156.41) | 1339 (137.75)                                                    | 1169.6 (234.66) | 1220.65 (34.73) | 1251.44 (99.75)                                                  | 292.53 (133.89) | 970.18 (146.92) | 976.97 (237.29) | 966.35 (70.96) | 991.67 (242.92) |
| Pennsylvania (PA)  | QALY    | 65.71 (1.57)                                                     | 66.79 (2.16)    | 67.96 (5.27)    | 69.23 (4.66)                                                     | 73.16 (4.1)     | 75.71 (3.52)    | 76.98 (2.51)                                                     | 78.02 (7.78)    | 65.84 (5.9)     | 69.41 (5.33)    | 70.34 (5.74)   | 71.61 (1.35)    |
|                    | Cost    | 26.22 (12.61)                                                    | -2.33 (6.52)    | -28.11 (44.78)  | -39.58 (15.7)                                                    | 21 (5.41)       | -12.94 (40.24)  | -35.49 (9.62)                                                    | -43.48 (33.62)  | -13.89 (6.96)   | -58.24 (1.72)   | -88.53 (9.64)  | -99.97 (6.08)   |
| Texas (TX)         | QALY    | 1.6 (0.08)                                                       | 1.59 (0.28)     | 1.66 (0.18)     | 1.65 (0.23)                                                      | 1.4 (0.03)      | 1.42 (0.09)     | 1.46 (0.07)                                                      | 1.46 (0.22)     | 0.97 (0.1)      | 0.97 (0.1)      | 1.03 (0.08)    | 1.03 (0.11)     |
|                    | Cost    | -28.43 (1.67)                                                    | -74.69 (0.56)   | -99.64 (2.35)   | -106.18 (2.1)                                                    | -28.99 (1.03)   | -75.32 (0.37)   | -100.33 (0.86)                                                   | -108.87 (1.01)  | -28.54 (0.21)   | -72.45 (1.63)   | -98.68 (0.27)  | -104.57 (2.26)  |

Notion: moving from scenarios 1 to 3, a higher percentage of infected individuals would quarantine.

Observation 1: we observe mixed results on the impact of scenarios 1-3 on the QALY saved: AZ/GA/PA (little to no impact), NY (curvilinear trend), MD/MA/MI/TX (decreasing trend), and CA (increasing trend).  
 Observation 2: we observe mixed results on the impact of scenarios 1-3 on the extra cost: AZ/MD/TX (little to no impact), MI/NY/PA (decreasing trend), and CA/GA/MA (increasing trend).

**Table E.7 Robustness check: hospitals' capacity (shaded area represents the results under the baseline scenario) Avg (std dev) of outcomes compared to no-intervention per 100K capita Outcomes: QALY gained (1,000 years) and extra cost (\$ million)**

| Pennsylvania       | Outcome | Scenario: hospital capacity of resources (50% of baseline) |                 |                 |                 | Scenario: hospital capacity of resources (baseline) |                 |                 |                 | Scenario: hospital capacity of resources (150% of baseline) |                 |                 |                 |
|--------------------|---------|------------------------------------------------------------|-----------------|-----------------|-----------------|-----------------------------------------------------|-----------------|-----------------|-----------------|-------------------------------------------------------------|-----------------|-----------------|-----------------|
|                    |         | Policies                                                   |                 |                 |                 | Policies                                            |                 |                 |                 | Policies                                                    |                 |                 |                 |
|                    |         | Current                                                    | P1              | P2              | P3              | Current                                             | P1              | P2              | P3              | Current                                                     | P1              | P2              | P3              |
| Arizona (AZ)       | QALY    | 0.67 (0.02)                                                | 1.44 (0.02)     | 1.54 (0.08)     | 1.62 (0.06)     | 0.6 (0.04)                                          | 1.29 (0.04)     | 1.41 (0.03)     | 1.44 (0.08)     | 0.56 (0.01)                                                 | 1.2 (0.08)      | 1.28 (0.01)     | 1.33 (0.03)     |
|                    | Cost    | -50.9 (1.6)                                                | -72.29 (0.75)   | -91.86 (0.22)   | -102.78 (1.95)  | -44.52 (1.4)                                        | -68 (0.52)      | -91.39 (0.72)   | -99.11 (1.23)   | -49.34 (0.52)                                               | -71.11 (1.59)   | -94.88 (1.28)   | -102.51 (0.81)  |
| California (CA)    | QALY    | 27.05 (2.99)                                               | 25.98 (3.62)    | 26.94 (1.71)    | 27.02 (3.91)    | 26.53 (3.51)                                        | 26.1 (3.76)     | 26.48 (3.59)    | 26.71 (2.95)    | 27.55 (3.67)                                                | 27.25 (1.35)    | 26.95 (1.36)    | 27.14 (0.67)    |
|                    | Cost    | 180.75 (12.89)                                             | 193.28 (54.01)  | 174.86 (51.61)  | 169.69 (61.75)  | 192.39 (38.96)                                      | 197.9 (17.52)   | 176.85 (9.9)    | 167.97 (53.27)  | 129.66 (36.73)                                              | 132.4 (23.84)   | 112.3 (19.18)   | 110.49 (5.92)   |
| Georgia (GA)       | QALY    | 38.5 (1.11)                                                | 39.83 (5.13)    | 40.62 (5.57)    | 40.54 (5.15)    | 36.07 (2.78)                                        | 37.41 (4.21)    | 38.29 (1.1)     | 38.89 (2.28)    | 32.94 (0.68)                                                | 33.52 (5.36)    | 34.99 (4.47)    | 35.13 (4.56)    |
|                    | Cost    | 14.86 (5.21)                                               | -22.51 (7.87)   | -47.41 (16.67)  | -58.1 (7.24)    | 20.91 (9.11)                                        | -15.66 (11.25)  | -36.03 (15.08)  | -43.86 (2.76)   | 23.36 (18.55)                                               | -9.31 (25.76)   | -33.34 (20.67)  | -42.45 (31.83)  |
| Maryland (MD)      | QALY    | 31.93 (1.94)                                               | 32.41 (0.65)    | 33.05 (4.72)    | 32.98 (3.09)    | 29.48 (0.98)                                        | 30.21 (0.59)    | 30.71 (1.47)    | 31.03 (0.64)    | 24.67 (3.18)                                                | 24.73 (0.79)    | 25.57 (2.21)    | 25.6 (0.65)     |
|                    | Cost    | -13.97 (17.14)                                             | -64.3 (19.03)   | -99.48 (21.23)  | -111.95 (21.92) | -30.33 (12.79)                                      | -68.63 (19.44)  | -97.44 (19.51)  | -110.45 (13.61) | -35.98 (14.99)                                              | -81.75 (6.04)   | -118.09 (7.92)  | -130.01 (4.09)  |
| Massachusetts (MA) | QALY    | 102.24 (3.54)                                              | 102.05 (3.64)   | 107.51 (3.86)   | 110.29 (2.3)    | 98.47 (3.68)                                        | 96.64 (3.56)    | 99.17 (2.09)    | 100.97 (4.8)    | 100.6 (3.35)                                                | 99.84 (1.47)    | 101.91 (0.68)   | 104.41 (1.86)   |
|                    | Cost    | 13.62 (6.01)                                               | 6.1 (16.14)     | -26.45 (13.78)  | -41.78 (17.46)  | 4.34 (12.21)                                        | -6.4 (8.99)     | -43.59 (17)     | -59.01 (8.52)   | 8.82 (7.62)                                                 | 1.42 (10.06)    | -31.13 (16.33)  | -44.66 (20.27)  |
| Michigan (MI)      | QALY    | 110.33 (4.71)                                              | 113.04 (8.27)   | 118.41 (8.87)   | 123.37 (4.81)   | 97.15 (4.41)                                        | 102 (5.2)       | 105.44 (5.71)   | 108.23 (9.59)   | 91.76 (3.3)                                                 | 97.65 (1.36)    | 97.55 (2.42)    | 100.27 (7.79)   |
|                    | Cost    | 361.98 (26.19)                                             | 366.12 (37.89)  | 344.76 (120.31) | 345.99 (39.34)  | 344.57 (48.72)                                      | 349.17 (54.16)  | 337.33 (57.16)  | 334.15 (65.37)  | 229.46 (105.74)                                             | 234.61 (90.06)  | 223.95 (98.21)  | 213.81 (117.66) |
| New York (NY)      | QALY    | 141.1 (2.75)                                               | 145.12 (2.1)    | 153.34 (7.74)   | 157.96 (1.26)   | 132.22 (0.82)                                       | 138.6 (5.84)    | 139.57 (7.46)   | 145.51 (2.42)   | 132.44 (2.78)                                               | 140.65 (2.86)   | 145.6 (2.93)    | 146.34 (6.94)   |
|                    | Cost    | 232.53 (260.45)                                            | 247.01 (237.16) | 242.11 (285.58) | 284.76 (224.53) | 1169.6 (234.66)                                     | 1220.65 (34.73) | 1251.44 (99.75) | 292.53 (133.89) | 1234.74 (235.4)                                             | 1249.55 (84.87) | 292.98 (156.39) | 1261.37 (93.95) |
| Pennsylvania (PA)  | QALY    | 67.35 (2.38)                                               | 68.67 (4.86)    | 70.33 (5.02)    | 69.05 (4.82)    | 73.16 (4.1)                                         | 75.71 (3.52)    | 76.98 (2.51)    | 78.02 (7.78)    | 63.4 (1.43)                                                 | 66.32 (1.04)    | 67.59 (3.44)    | 67.84 (2.4)     |
|                    | Cost    | 19.42 (36.71)                                              | -11.98 (18.88)  | -40.04 (32.4)   | -51.28 (29.64)  | 21 (5.41)                                           | -12.94 (40.24)  | -35.49 (9.62)   | -43.48 (33.62)  | 7.61 (17.69)                                                | -28.73 (10.89)  | -56.09 (36.25)  | -64.48 (8.55)   |
| Texas (TX)         | QALY    | 1.32 (0.18)                                                | 1.37 (0.2)      | 1.39 (0.12)     | 1.39 (0.09)     | 1.4 (0.03)                                          | 1.42 (0.09)     | 1.46 (0.07)     | 1.46 (0.22)     | 1.3 (0.19)                                                  | 1.33 (0.1)      | 1.38 (0.21)     | 1.43 (0.1)      |
|                    | Cost    | -27.78 (0.95)                                              | -72.39 (0.29)   | -95.24 (0.93)   | -105.83 (1.59)  | -28.99 (1.03)                                       | -75.32 (0.37)   | -100.33 (0.86)  | -108.87 (1.01)  | -30.92 (1.14)                                               | -76.36 (1.16)   | -102.81 (1.74)  | -112.79 (0.47)  |

Notion: moving from scenarios 1 to 3, the number of hospital resources would increase.

Observation 1: there is little to no change in the QALY saved when the number of hospital resources increases (e.g., scenario 3 compared to scenarios 1-2). Exception: MI (decreasing trend).

Observation 2: we observe mixed results on the impact of scenarios 1-3 on the extra cost: AZ/NY/TX (little to no impact), MA/PA (curvilinear trend), CA/MD/MI (decreasing trend), and GA (increasing trend).

## References

- AHA: American Hospital Association (2022) Ventilator Fact Sheet. [Link](#).
- Arias E, Tejada-Vera B, Ahmad F (2021) Provisional life expectancy estimates for January through June, 2020. Retrieved May 06, 2022, [Link](#).
- Bourdeaux M, Kaushal J, Bilmes L, Sasdi A, Mishra M and others (2021) Estimating the costs and benefits of supported quarantine and isolation in Massachusetts: The missing link in COVID-19 response. Retrieved May 05, 2022, [Link](#).
- CDC: Centers for Disease Control and Prevention (2020) Current Hospital Capacity Estimates – Snapshot. Retrieved May 03, 2022, [Link](#).
- Dasta JF, McLaughlin TP, Mody SH, Piech CT (2005) Daily cost of an intensive care unit day: the contribution of mechanical ventilation. *Critical Care Medicine*. 33(6):1266–1271.
- Coronavirus.dc.gov (2022) Hospital Status Data. Retrieved May 03, 2022, [Link](#).
- Dyrbye LN, Thomas MR, Eacker A, Harper W, Massie FS, and others (2007) Race, ethnicity, and medical student well-being in the United States. *Archives of Internal Medicine*. 167(19):2103–2109.
- Grassi L, Caruso R, Da Ronch C, Härter M, Schulz H, and others (2020) Quality of life, level of functioning, and its relationship with mental and physical disorders in the elderly: Results from the MentDis-ICF65+ study. *Health and Quality of Life Outcomes*. 18(1):1–12.
- KFF: The Henry J. Kaiser Family Foundation (2018a) Hospital adjusted expenses per inpatient day. Retrieved Jul 01, 2020, [Link](#).
- Liu K, Zhang W, Yang Y, Zhang J, Li Y, Chen Y (2020) Respiratory rehabilitation in elderly patients with COVID-19: A randomized controlled study. *Complementary Therapies in Clinical Practice*. 1–4.
- Medtronic: Healthcare Professional Resources Blog (2021) High-Acuity Ventilator Cost Guide. Retrieved May 05, 2022, [Link](#).
- Modern Healthcare (2015) Hospitals paying more for electric beds. Retrieved May 05, 2022, [Link](#).
- Norris C, Jacobs P, Rapoport J, Hamilton S (1995) ICU and non-ICU cost per day. *Canadian Journal of Anaesthesia*. 42(3):192–196.
- Parker K, Minkin R, Bennett J (Pew Research Center) (2020) Economic Fallout From COVID-19 Continues To Hit Lower-Income Americans the Hardest. Retrieved Nov 13, 2020, [Link](#).
- Rubinson L, Vaughn F, Nelson S, Giordano S, Kallstrom T, and others (2010) Mechanical ventilators in US acute care hospitals. *Disaster Medicine and Public Health Preparedness*. 4(3):199–206.
- Saenz R, Sparks C (University of New Hampshire) (2020) The Inequities of Job Loss and Recovery Amid the COVID-19 Pandemic. Retrieved Nov 13, 2020, [Link](#).
- Sassi F (2006) Calculating QALYs, comparing QALY and DALY calculations. *Health Policy and Planning*. 21(5):402–408.
- Statista (2020) Thinking about what you earned on average a month, before the COVID-19 / coronavirus pandemic, what percentage of income have you lost over the past 4 weeks due to its impact? Retrieved Jul 01, 2020, [Link](#).
- YCHARTS (2020) US health care inflation rate. Retrieved Jul 01, 2020, [Link](#).
